# Supplementary material for: Astragaloside IV protects against podocyte injury via SERCA2-dependent ER stress reduction and AMPKα-regulated autophagy induction in streptozotocin-induced diabetic nephropathy
Source: PubMed Central journal article supplement (PMC5537362; doi:10.1038/s41598-017-07061-7), 2017-07-31
Supplement: 41598_2017_7061_MOESM1_ESM.pdf [file 41598_2017_7061_MOESM1_ESM.pdf]

**Astragaloside IV protects against podocyte injury via SERCA2-dependent ER stress reduction and AMPK $\alpha$ -regulated autophagy induction in streptozotocin-induced diabetic nephropathy**

Hengjiang Guo<sup>1, #</sup>, Yi Wang<sup>2, #</sup>, Xuemei Zhang<sup>3</sup>, Yingjun Zang<sup>2</sup>, Yang Zhang<sup>2</sup>, Li Wang<sup>1</sup>, Hao Wang<sup>2</sup>, Yunman Wang<sup>2</sup>, Aili Cao<sup>1, \*</sup>, Wen Peng<sup>1, 2, \*</sup>

<sup>1</sup>Laboratory of Renal Disease, <sup>2</sup>Department of Nephrology, Putuo Hospital, Shanghai University of Traditional Chinese Medicine, Shanghai, China

<sup>3</sup>Department of Pharmacology, School of Pharmacy, Fudan University, Shanghai 201203, China

# These authors contributed equally to this work.

**\* Correspondence:**

Wen Peng

pengwen\_01@vip.sina.com

Aili Cao

Caoaili0312@sina.cn

**Supplementary Figure S1.** AS-IV alleviated renal histopathology and inflammation in STZ-induced diabetic mice.

**Supplementary Figure S2.** The original blots for cropped blots presented in Figure 1.

**Supplementary Figure S3.** The original blots for cropped blots presented in Figure 2.

**Supplementary Figure S4.** The original blots for cropped blots presented in Figure 3.

**Supplementary Figure S5.** The original blots for cropped blots presented in Figure 4.

**Supplementary Figure S6.** The original blots for cropped blots presented in Figure 5.

**Supplementary Figure S7.** The original blots for cropped blots presented in Figure 6.

**Supplementary Figure S8.** The original blots for cropped blots presented in Figure 7.

**Supplementary Figure S9.** The original blots for cropped blots presented in Figure 8.

**Supplementary Figure S10.** The original blots for cropped blots presented in Figure 9.

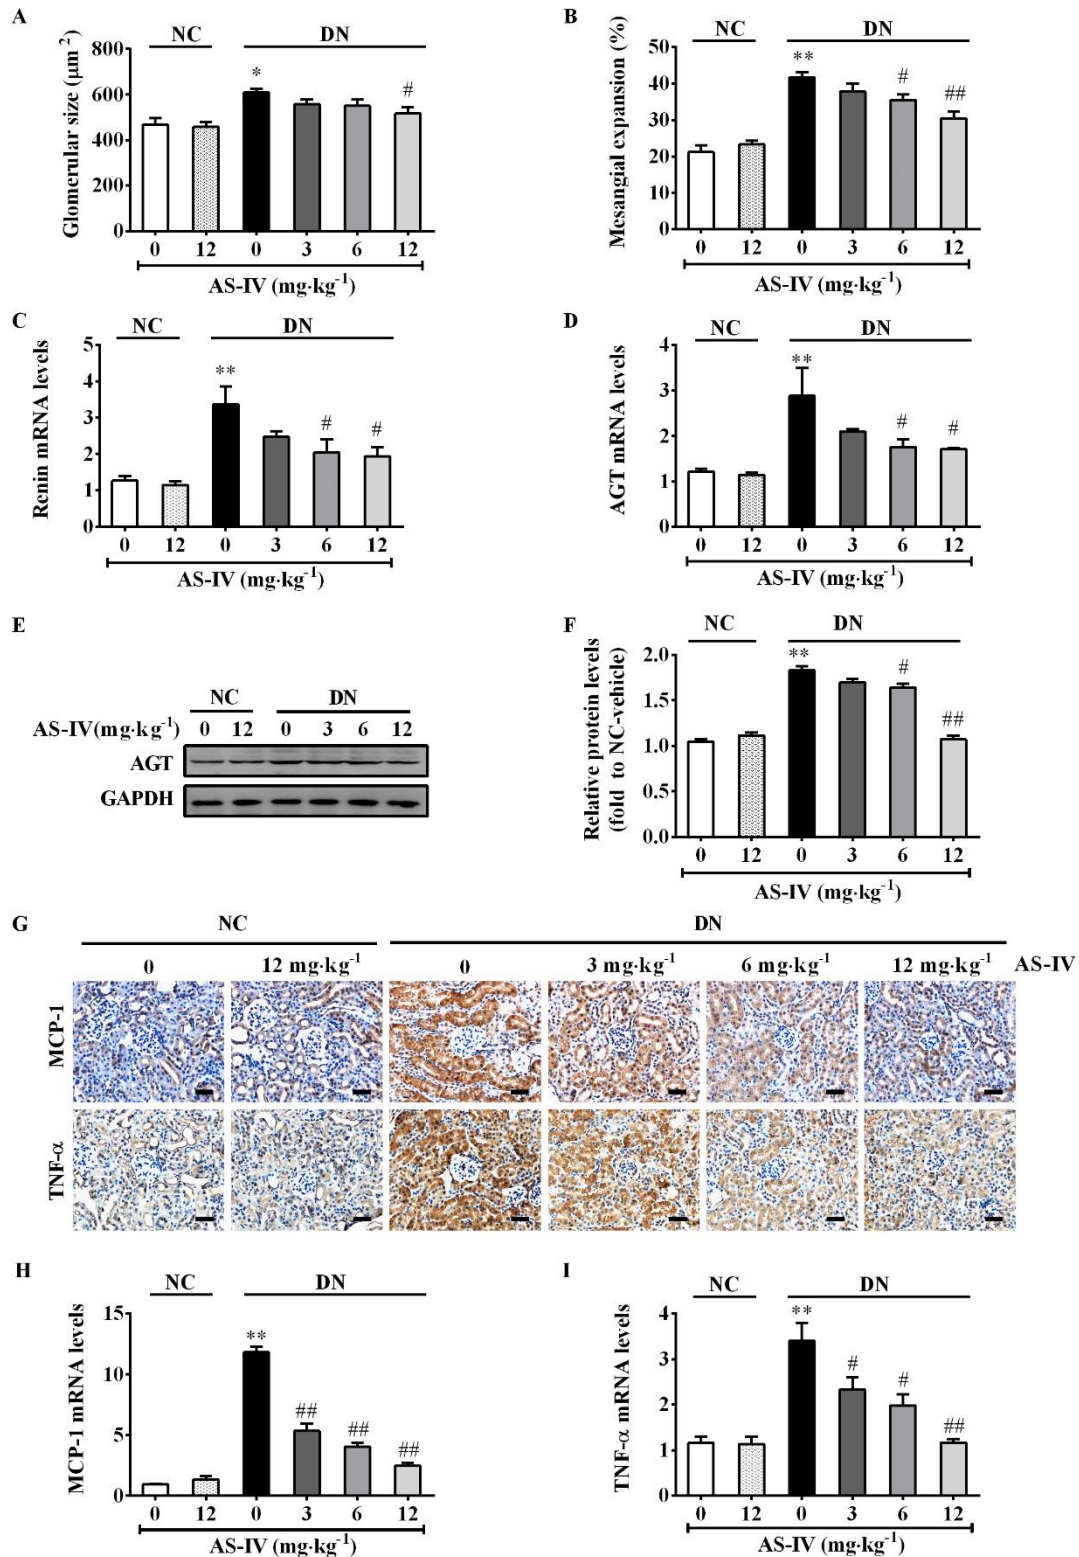

**Supplementary Figure S1. AS-IV alleviated renal histopathology and inflammation in STZ-induced diabetic mice.** (A) Glomerular size in each group. (B) Mesangial expansion in each group. Data are expressed as the percentage of the mesangial matrix area/total glomerular area. (C) The relative expression of Renin

mRNA in renal cortex. (D) The relative expression of AGT mRNA in renal cortex. (E) Western blot analyses of AGT expression in each group. (F) Densitometric quantification of AGT expression in each group. (G) Representative images of immunohistochemistry staining for MCP-1 and TNF- $\alpha$ . Scale bars, 20  $\mu$ m; (H) The relative expression of MCP-1 mRNA in renal cortex. (I) The relative expression of TNF- $\alpha$  mRNA in renal cortex. n=4-6 per group. \* $P$  < 0.05, \*\* $P$  < 0.01 compared to NC-vehicle group; # $P$  < 0.05, ## $P$  < 0.01 compared to DN-vehicle group. One-way ANOVA and Newman-Keuls multiple comparisons test (A, B, D, E). NC, nondiabetic control. DN, diabetic nephropathy.

**A**

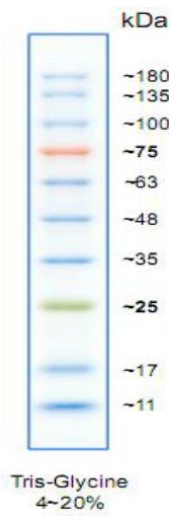

**B**

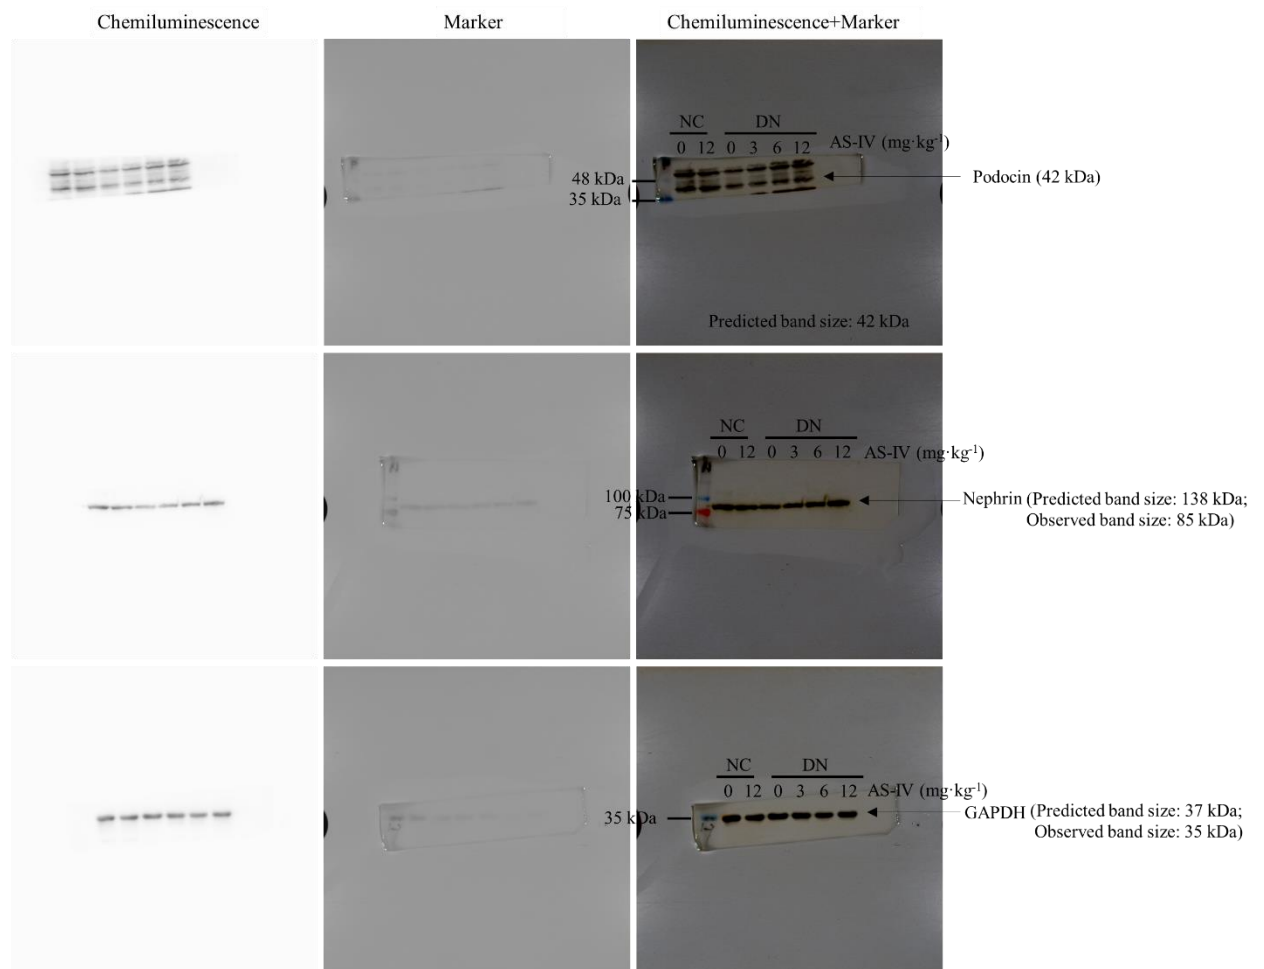

**Supplementary Figure S2. The original blots for cropped blots presented in Figure 1. (A) Prestained dual color protein molecular weight marker. (B) The original blots for panel I presented in Figure 1 in the main text. NC, nondiabetic control. DN, diabetic nephropathy.**

**A**

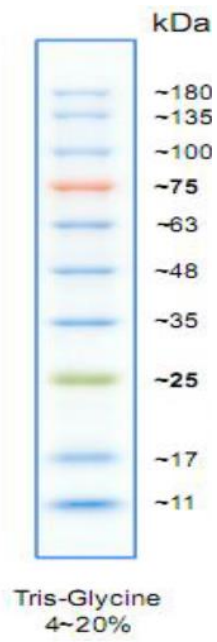

**B**

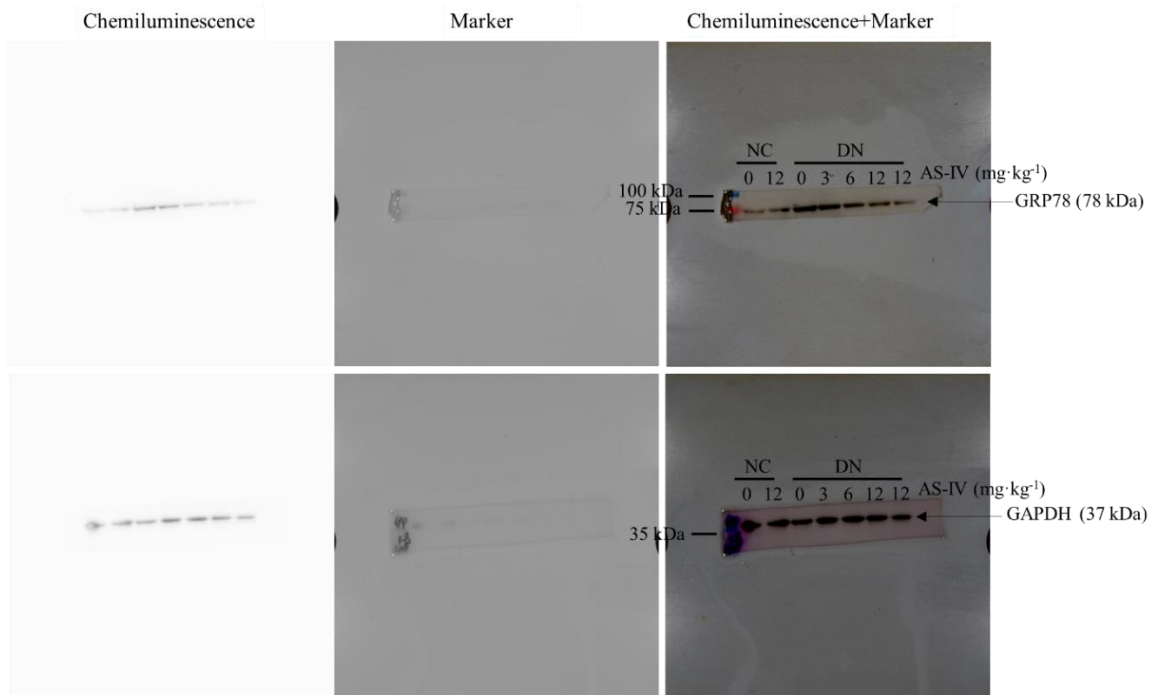

C

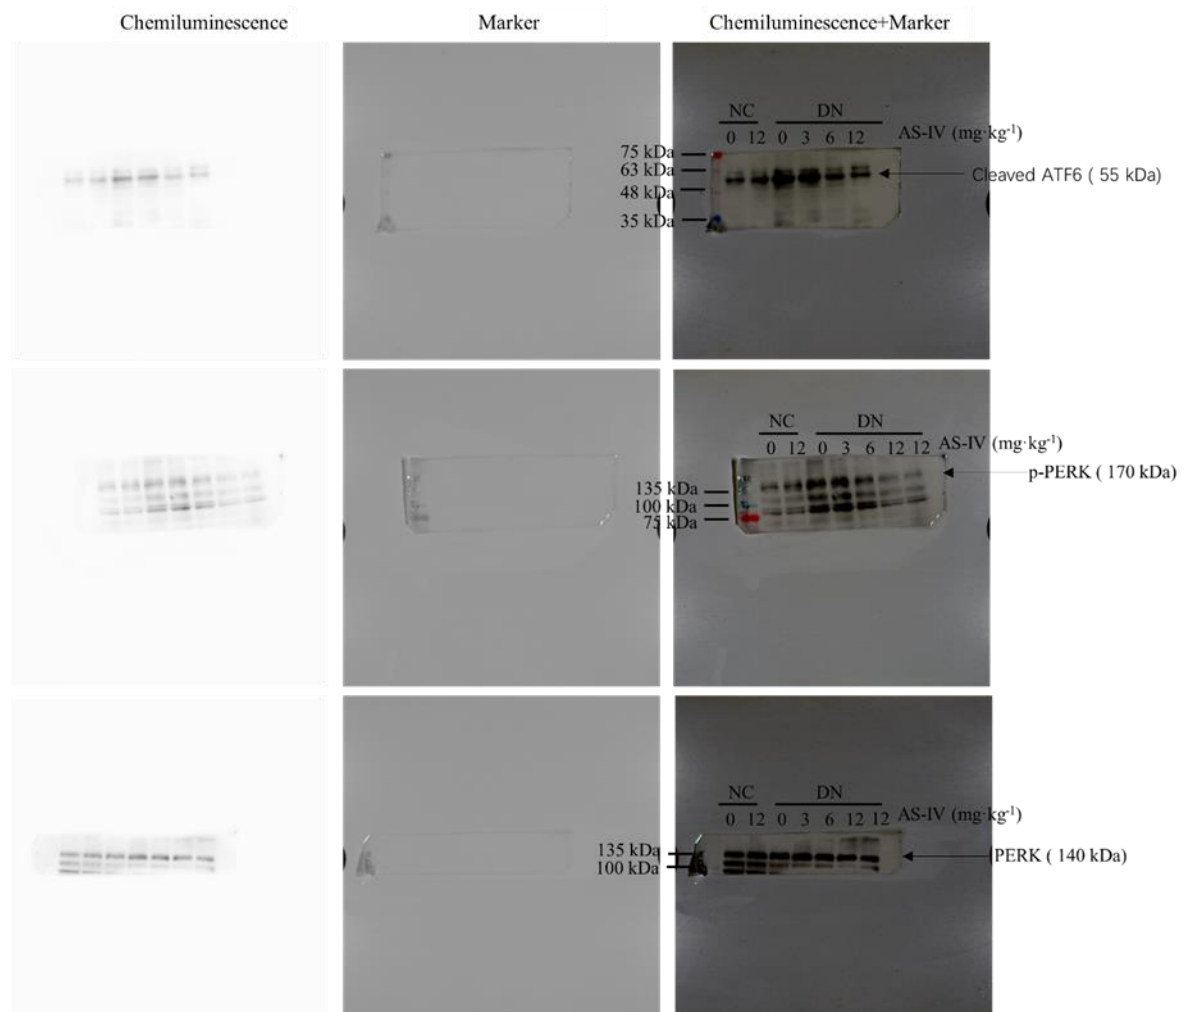

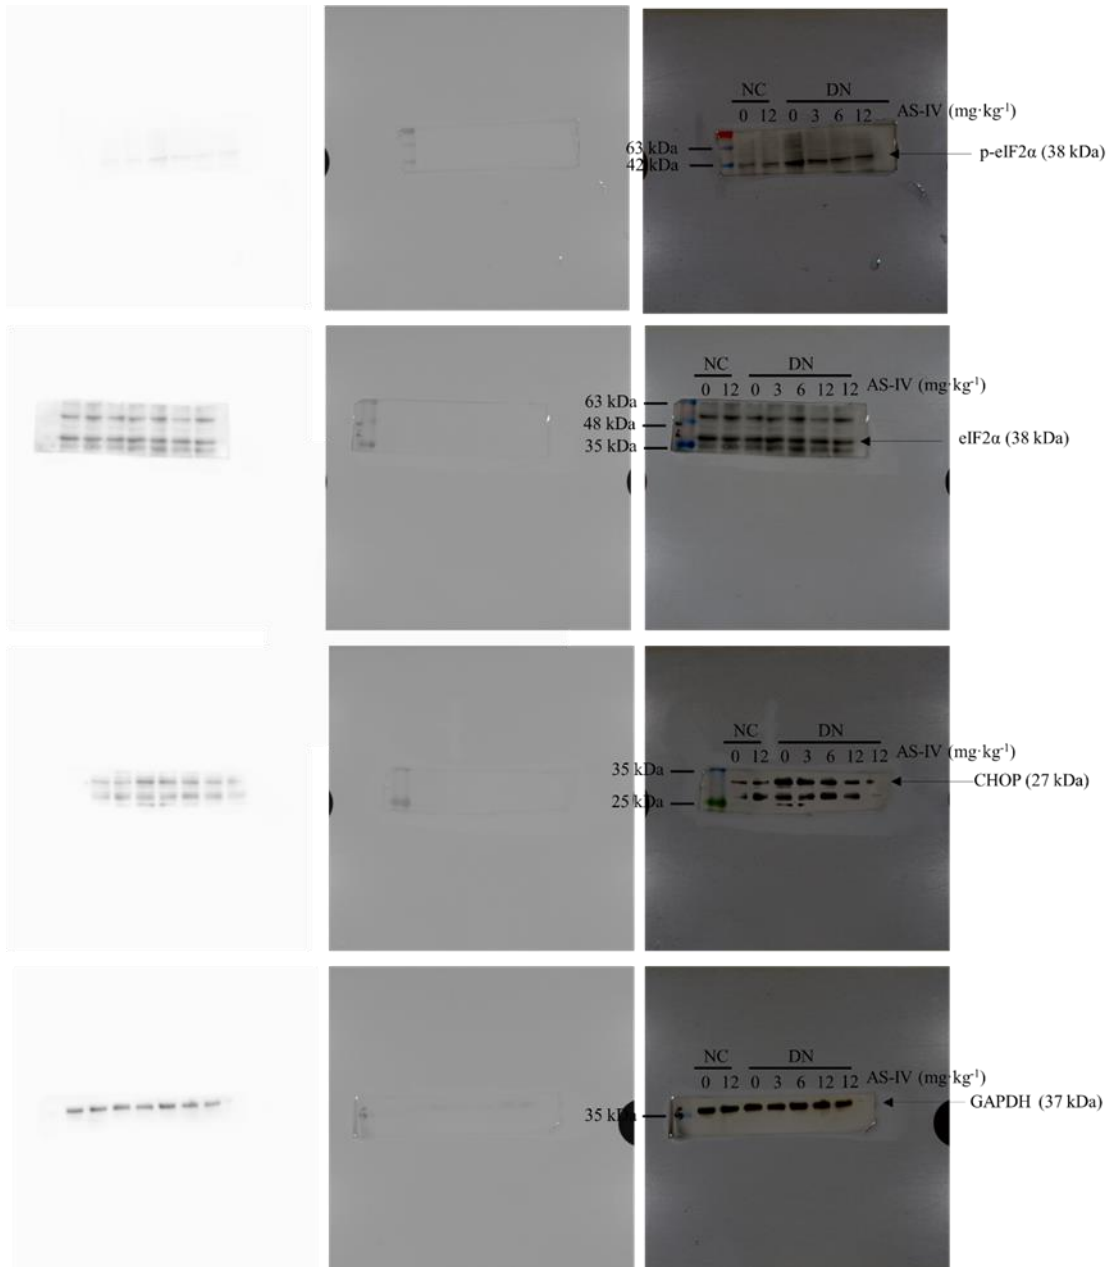



**D**

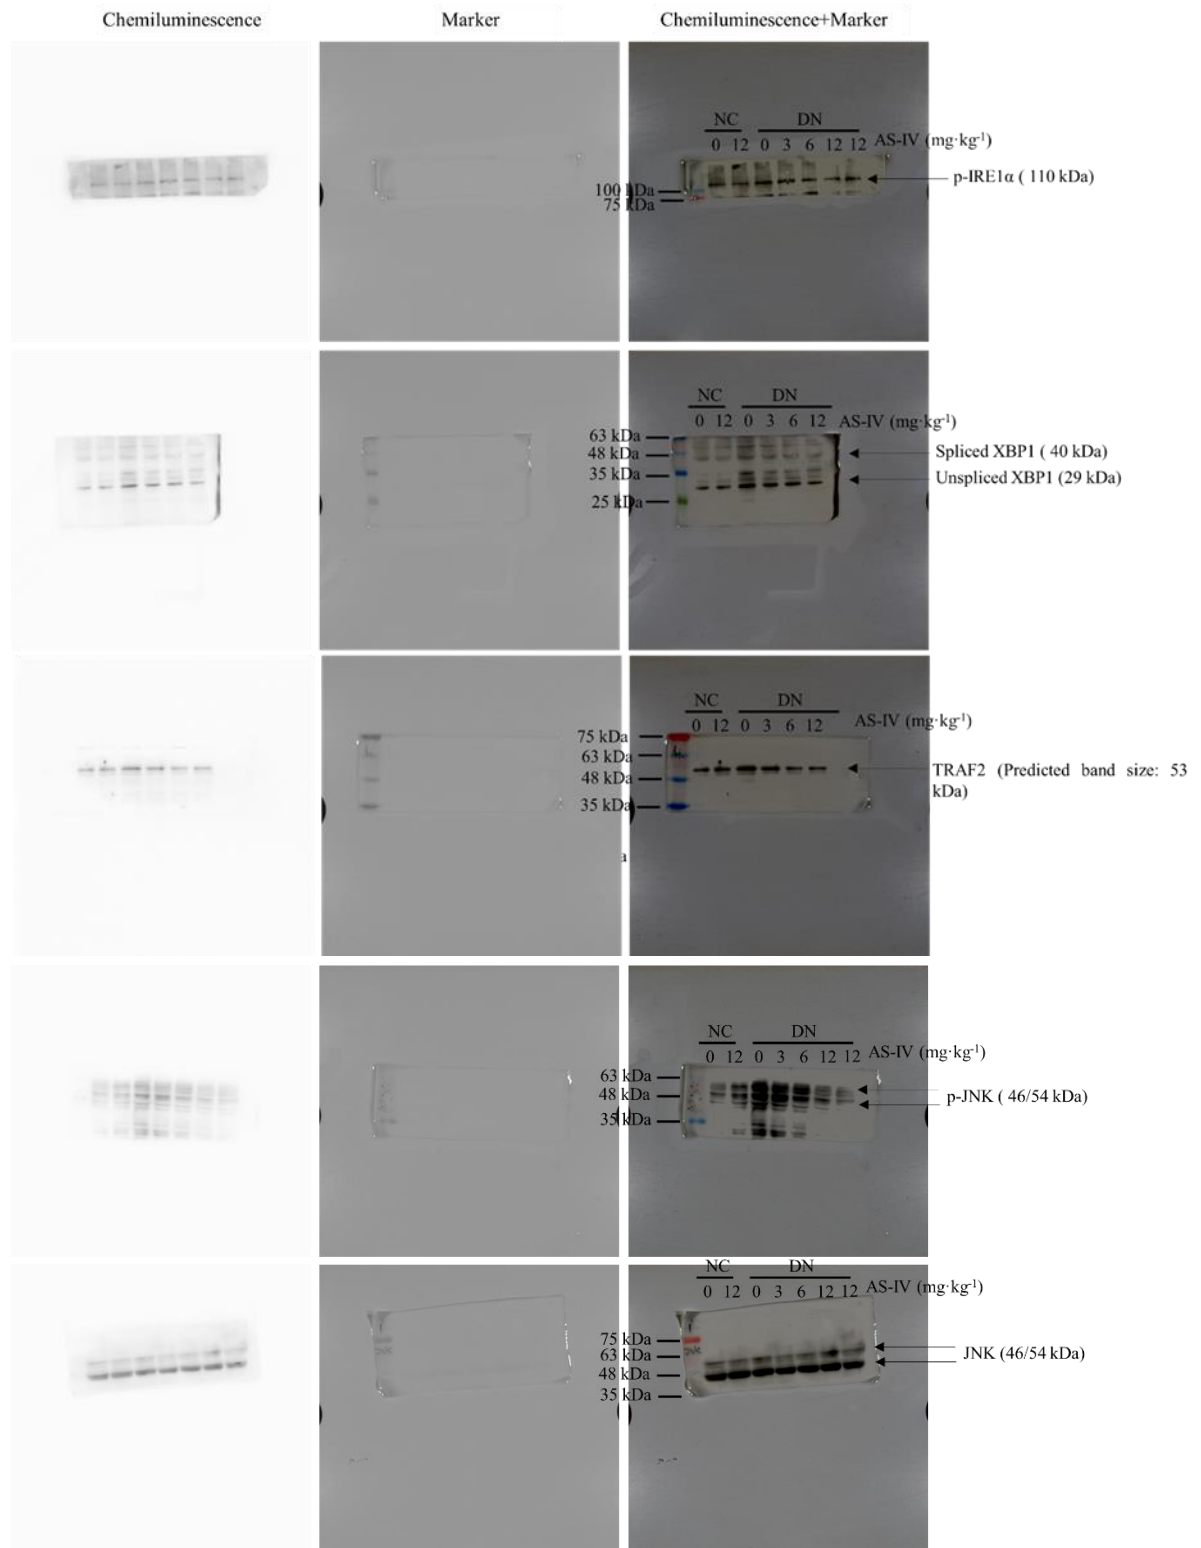

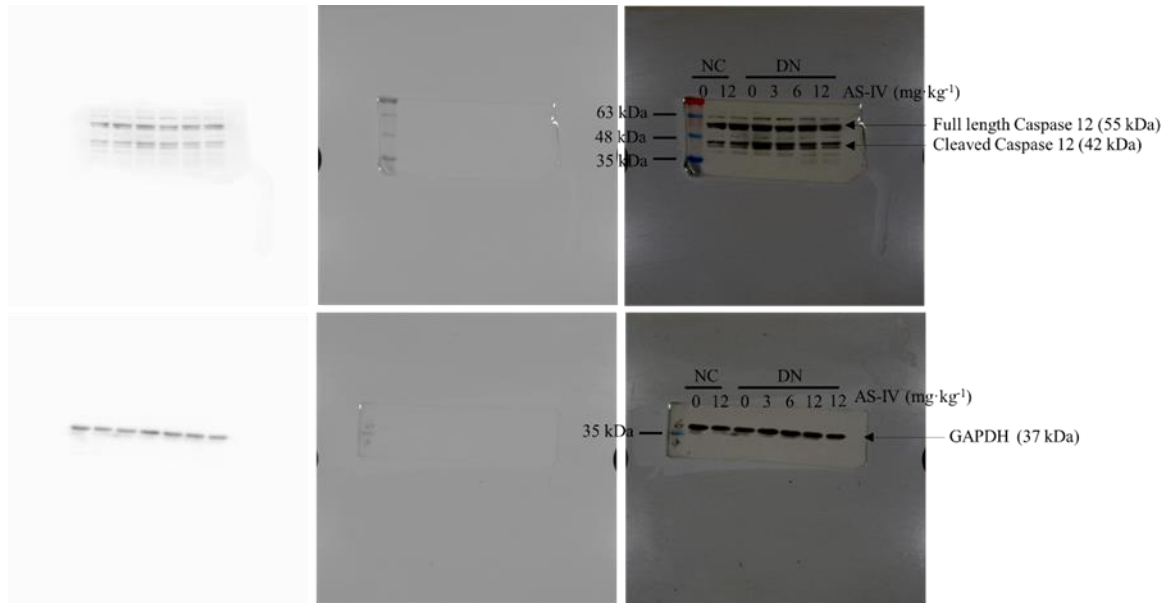

**Supplementary Figure S3. The original blots for cropped blots presented in Figure 2.** (A) Prestained dual color protein molecular weight marker. (B) The original blots for panel B presented in Figure 2 in the main text. (C) The original blots for panel D presented in Figure 2 in the main text. (D) The original blots for panel F presented in Figure 2 in the main text. NC, nondiabetic control. DN, diabetic nephropathy.

**A**

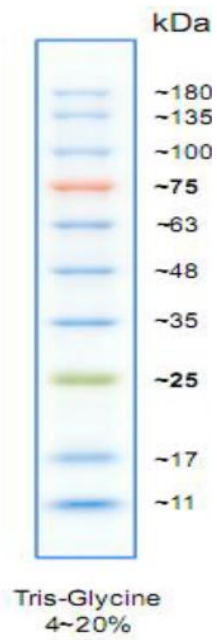

**B**

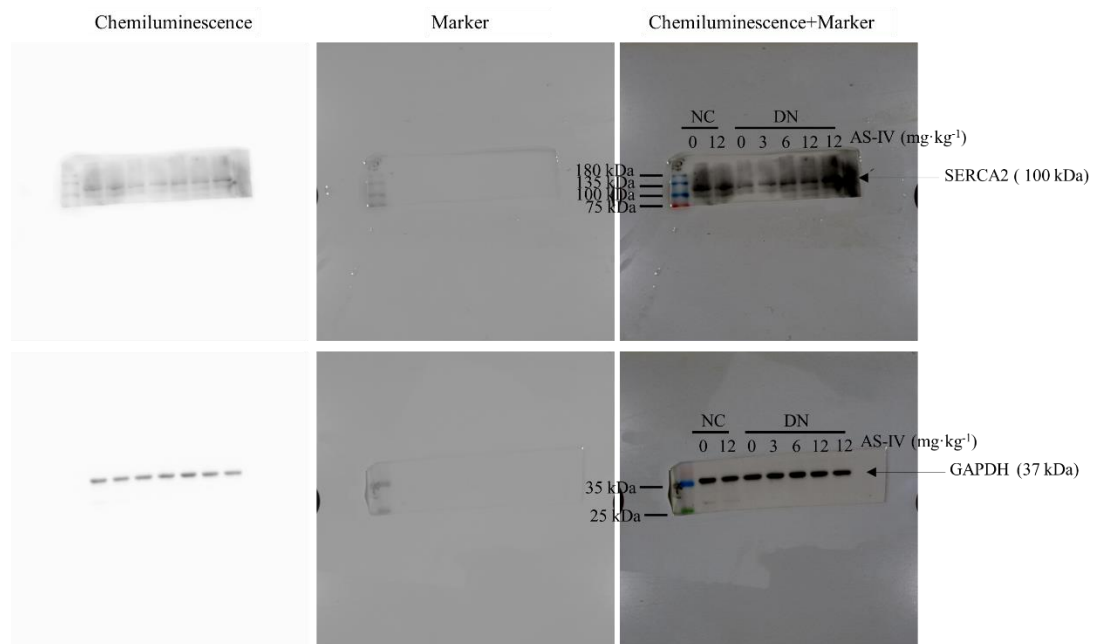

**Supplementary Figure S4. The original blots for cropped blots presented in Figure 3. (A) Prestained dual color protein molecular weight marker. (B) The original blots for panel E presented in Figure 3 in the main text. NC, nondiabetic control. DN, diabetic nephropathy.**

A

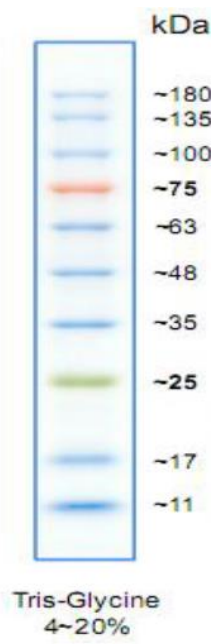

**B**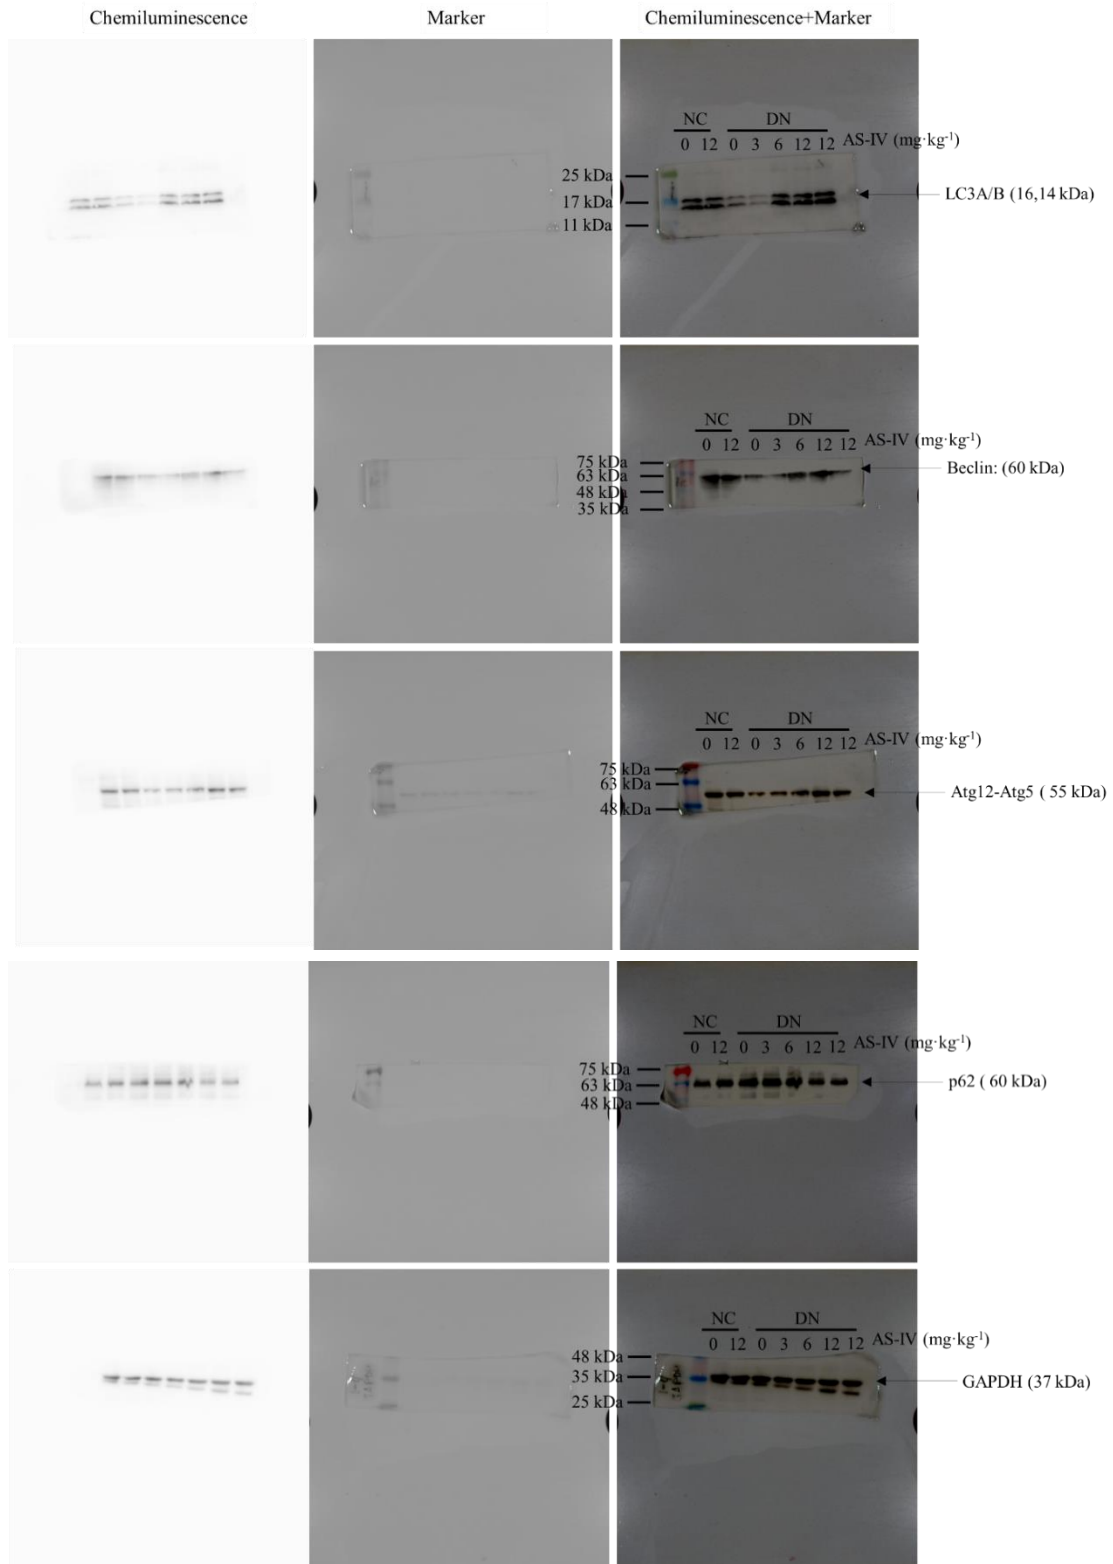

C.

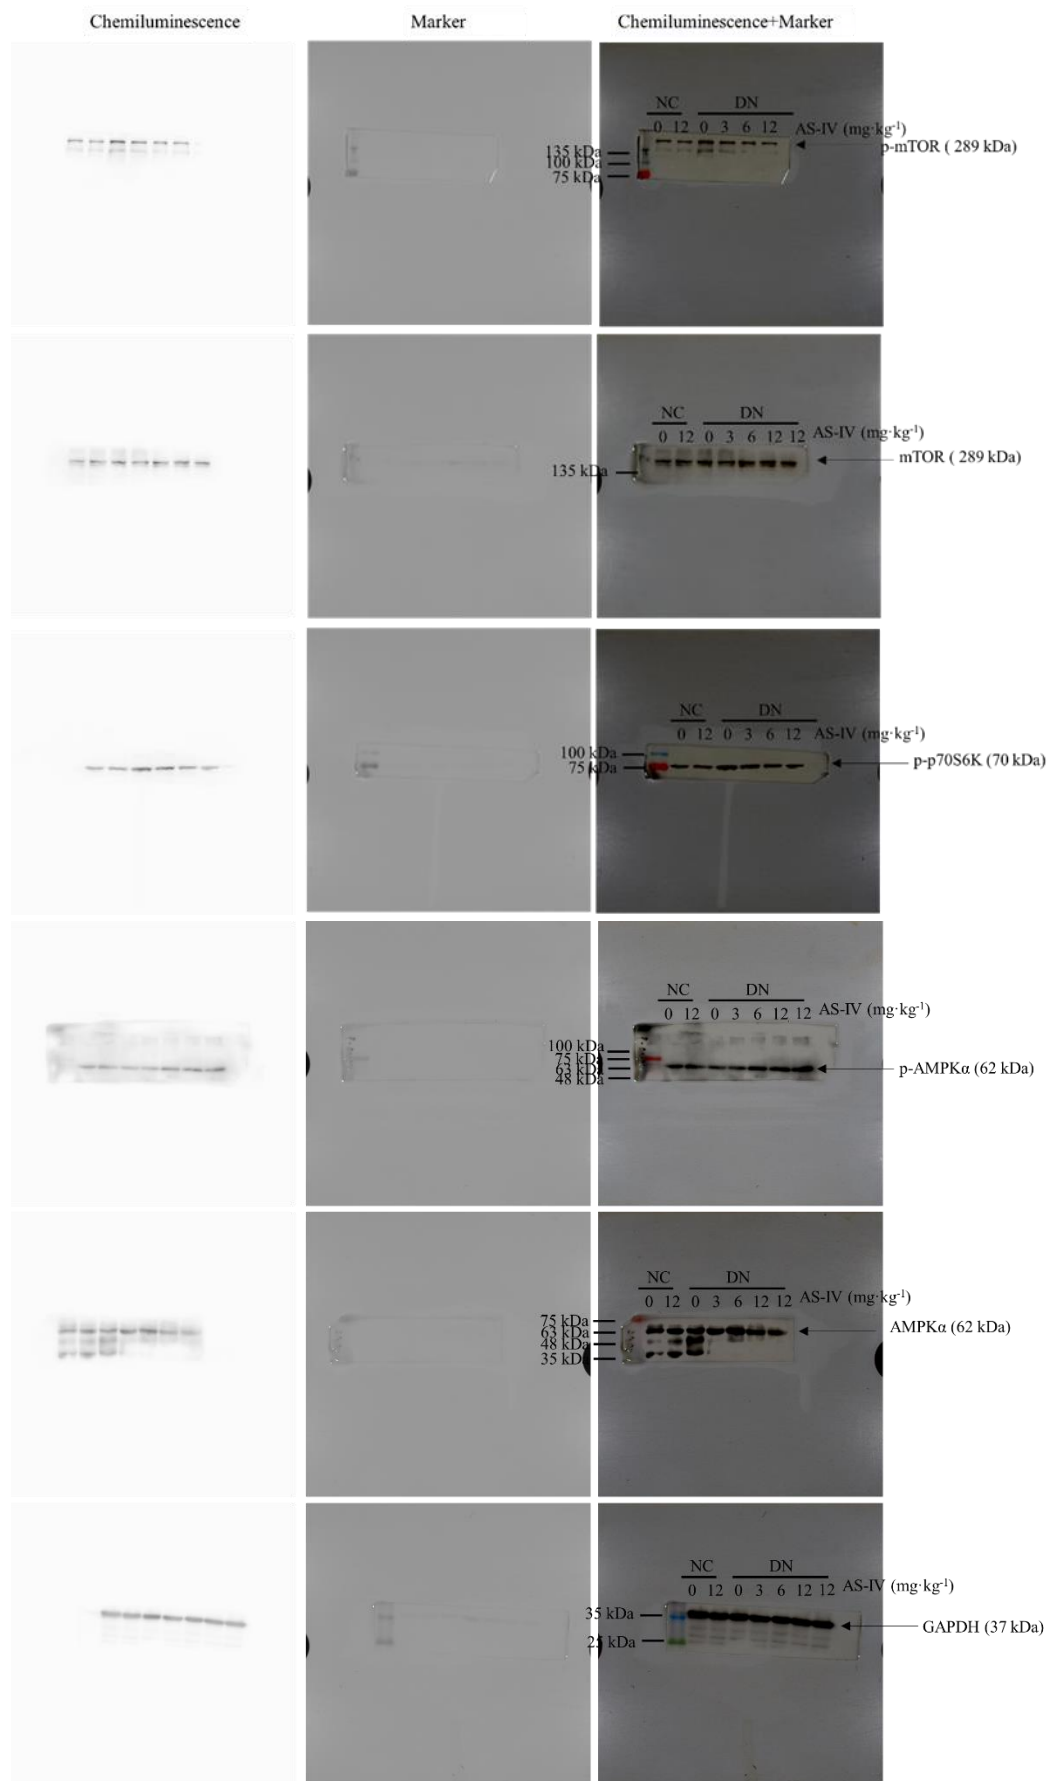

**Supplementary Figure S5. The original blots for cropped blots presented in Figure 4.** (A) Prestained dual color protein molecular weight marker. (B) The original blots for panel C presented in Figure 4 in the main text. (C) The original blots for panel E presented in Figure 4 in the main text. NC, nondiabetic control. DN, diabetic nephropathy.

**A**



**B**

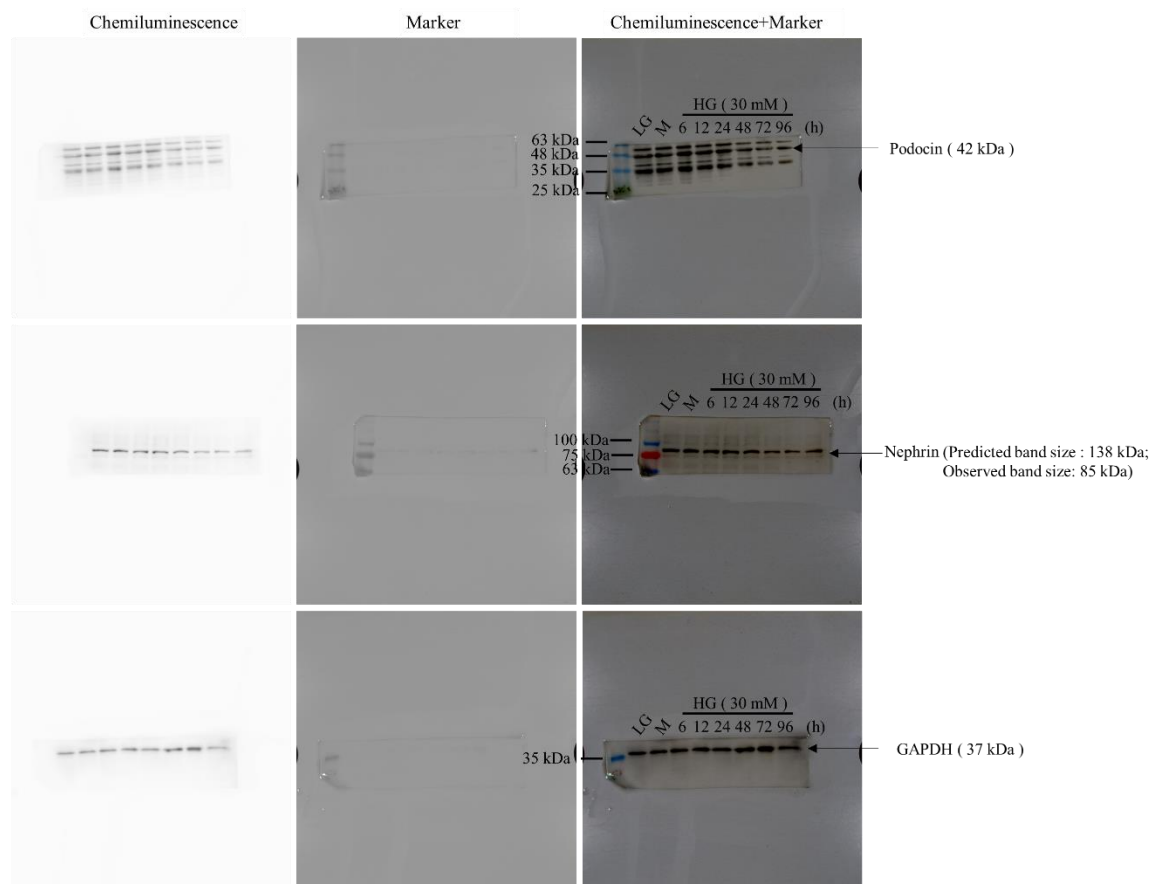



C

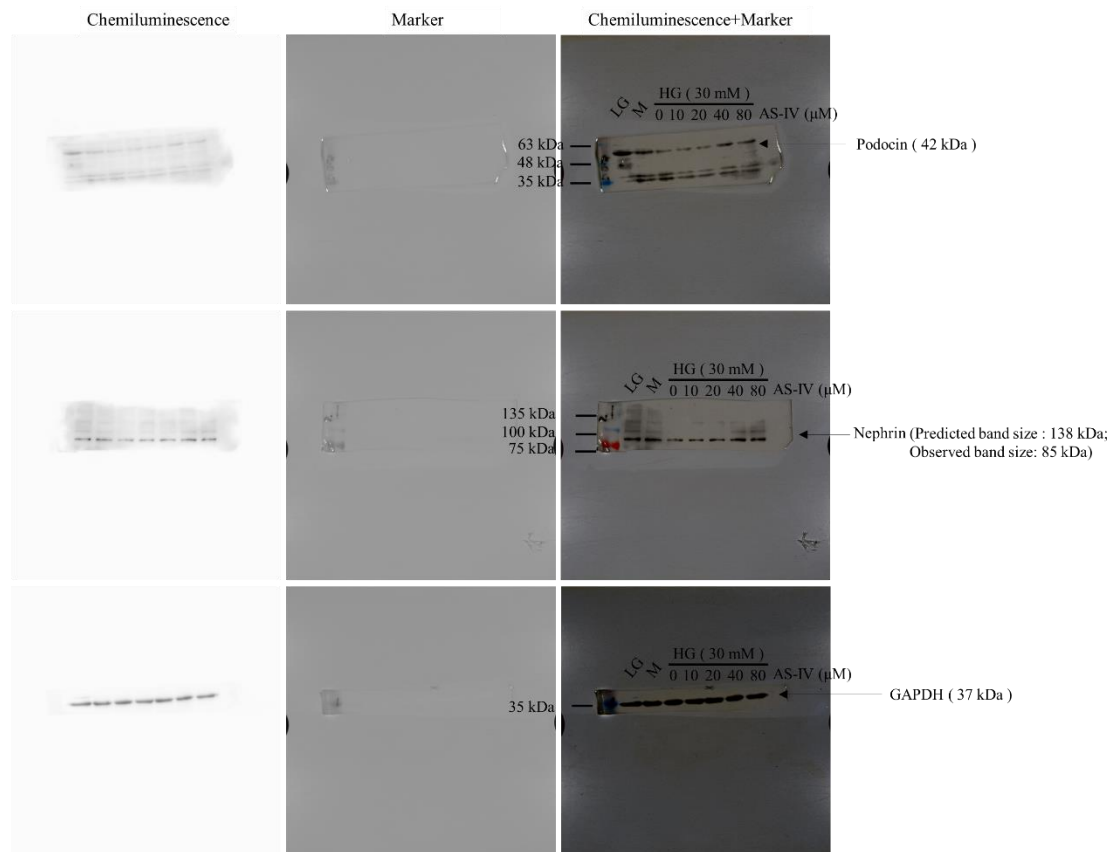

**Supplementary Figure S6. The original blots for cropped blots presented in Figure 5. (A) Prestained dual color protein molecular weight marker. (B) The original blots for panel C presented in Figure 5 in the main text. (C) The original blots for panel G presented in Figure 5 in the main text. LG, low glucose; M, mannitol; HG, high glucose.**

A

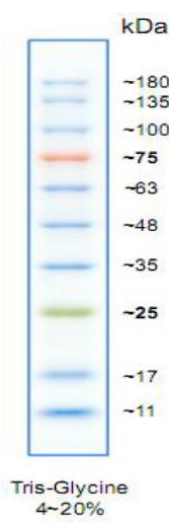

**B**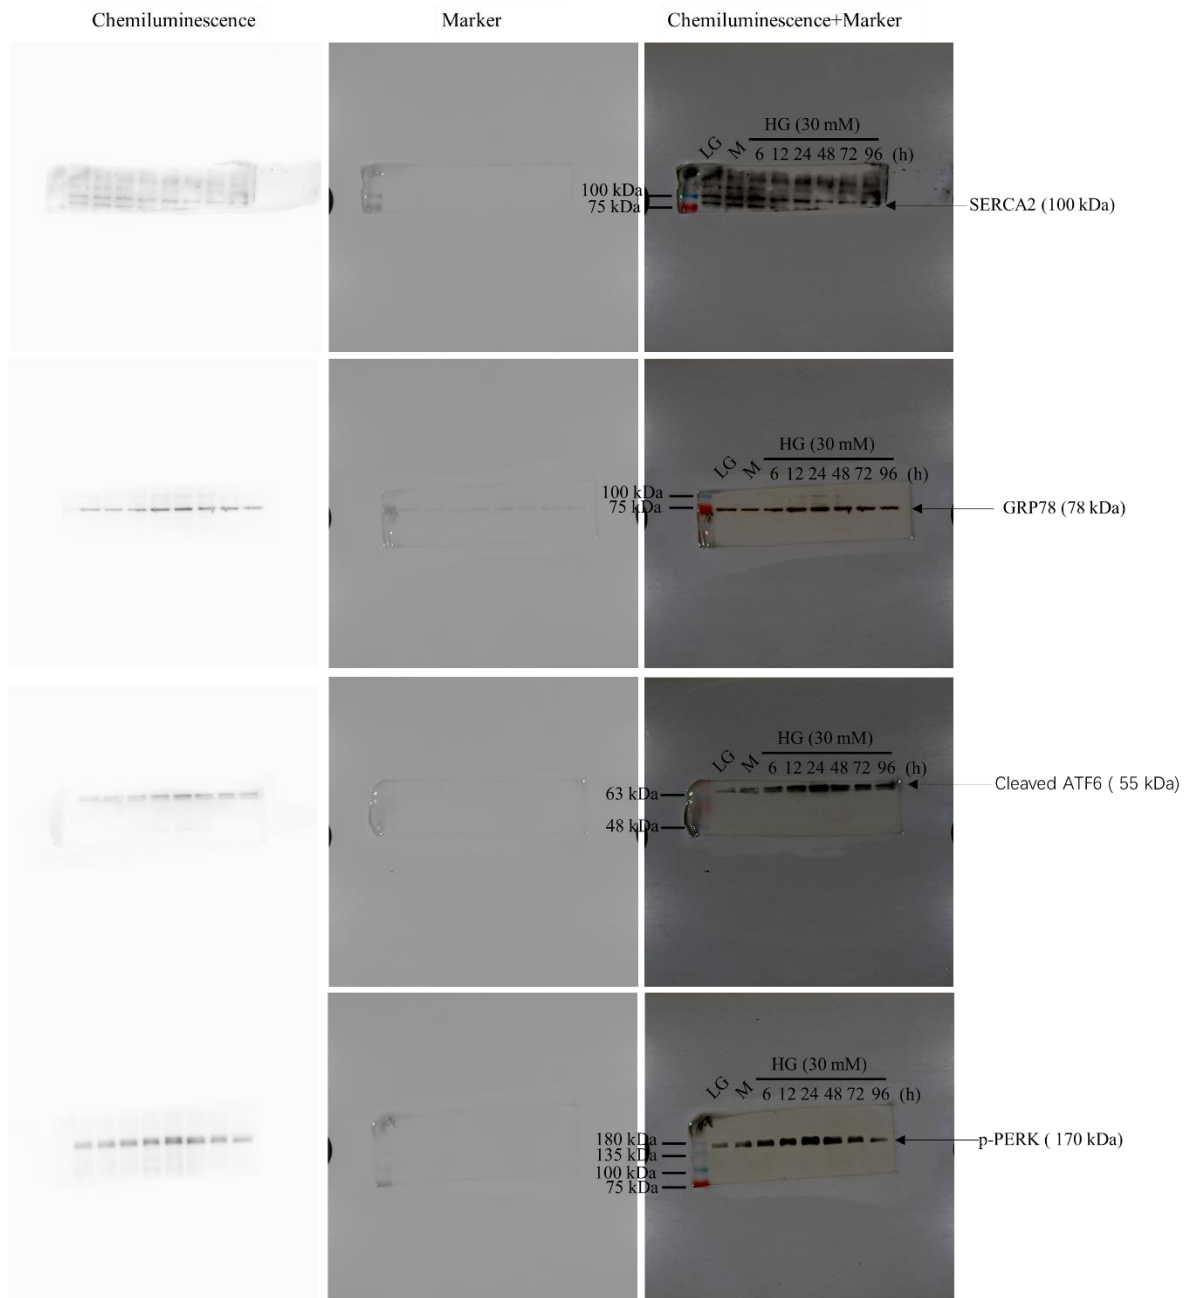



C

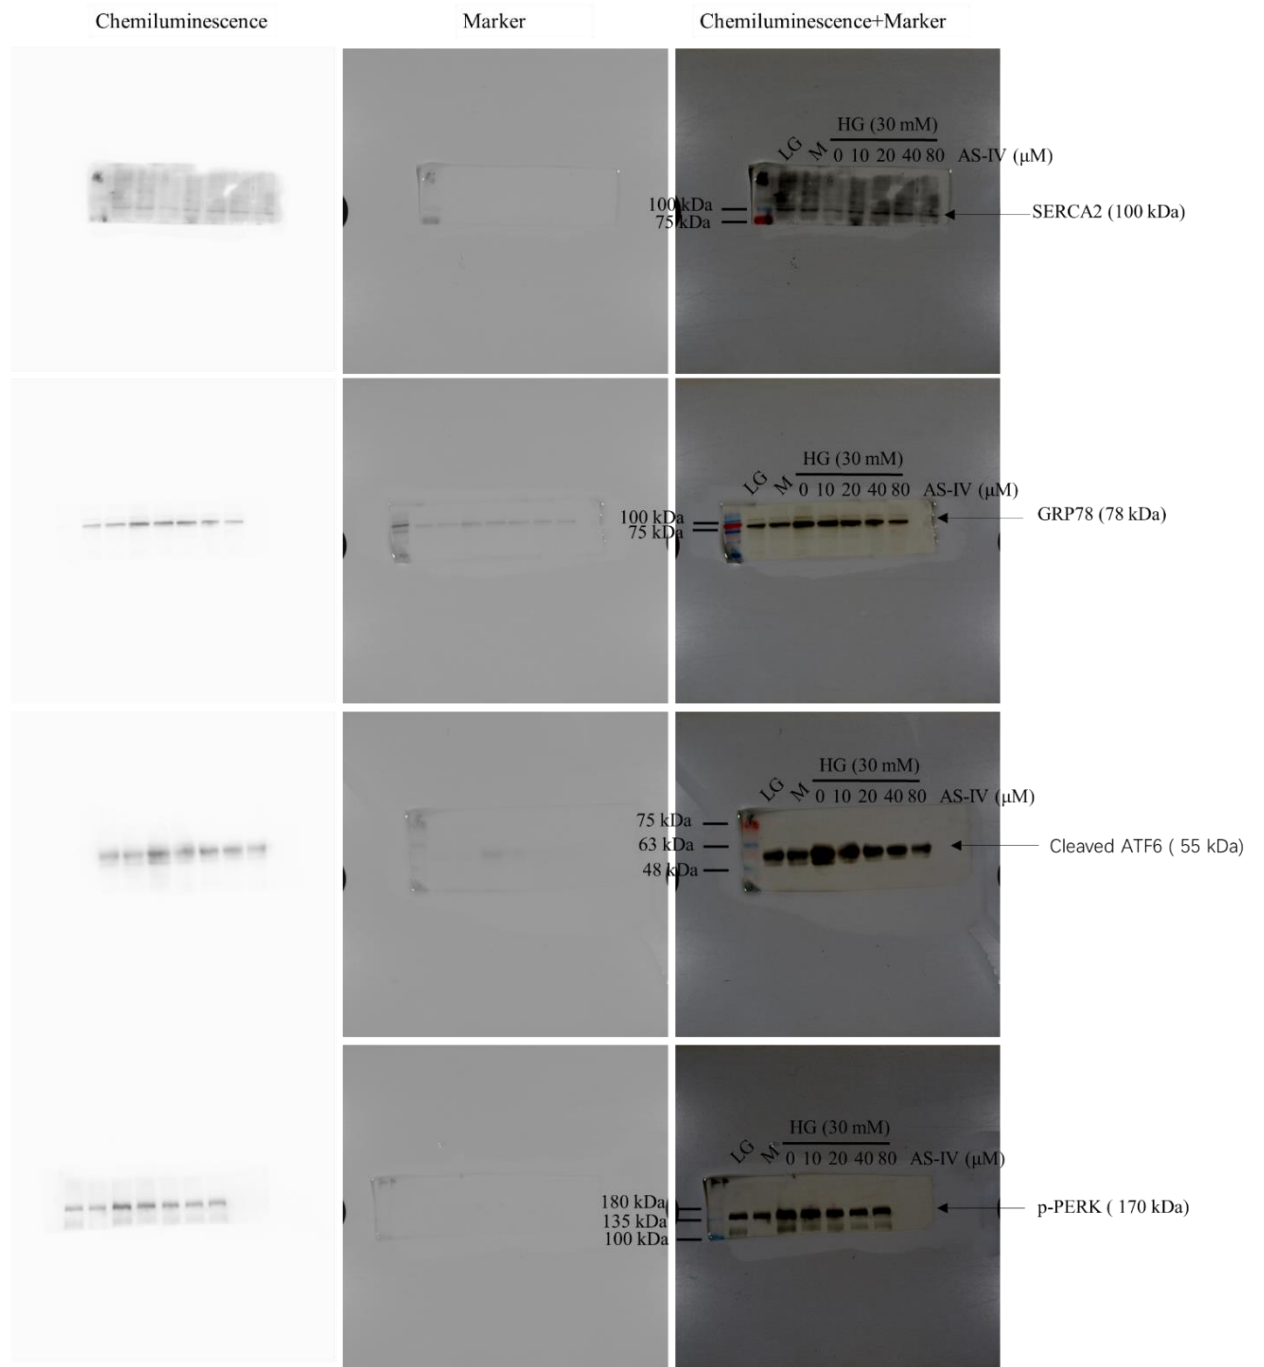

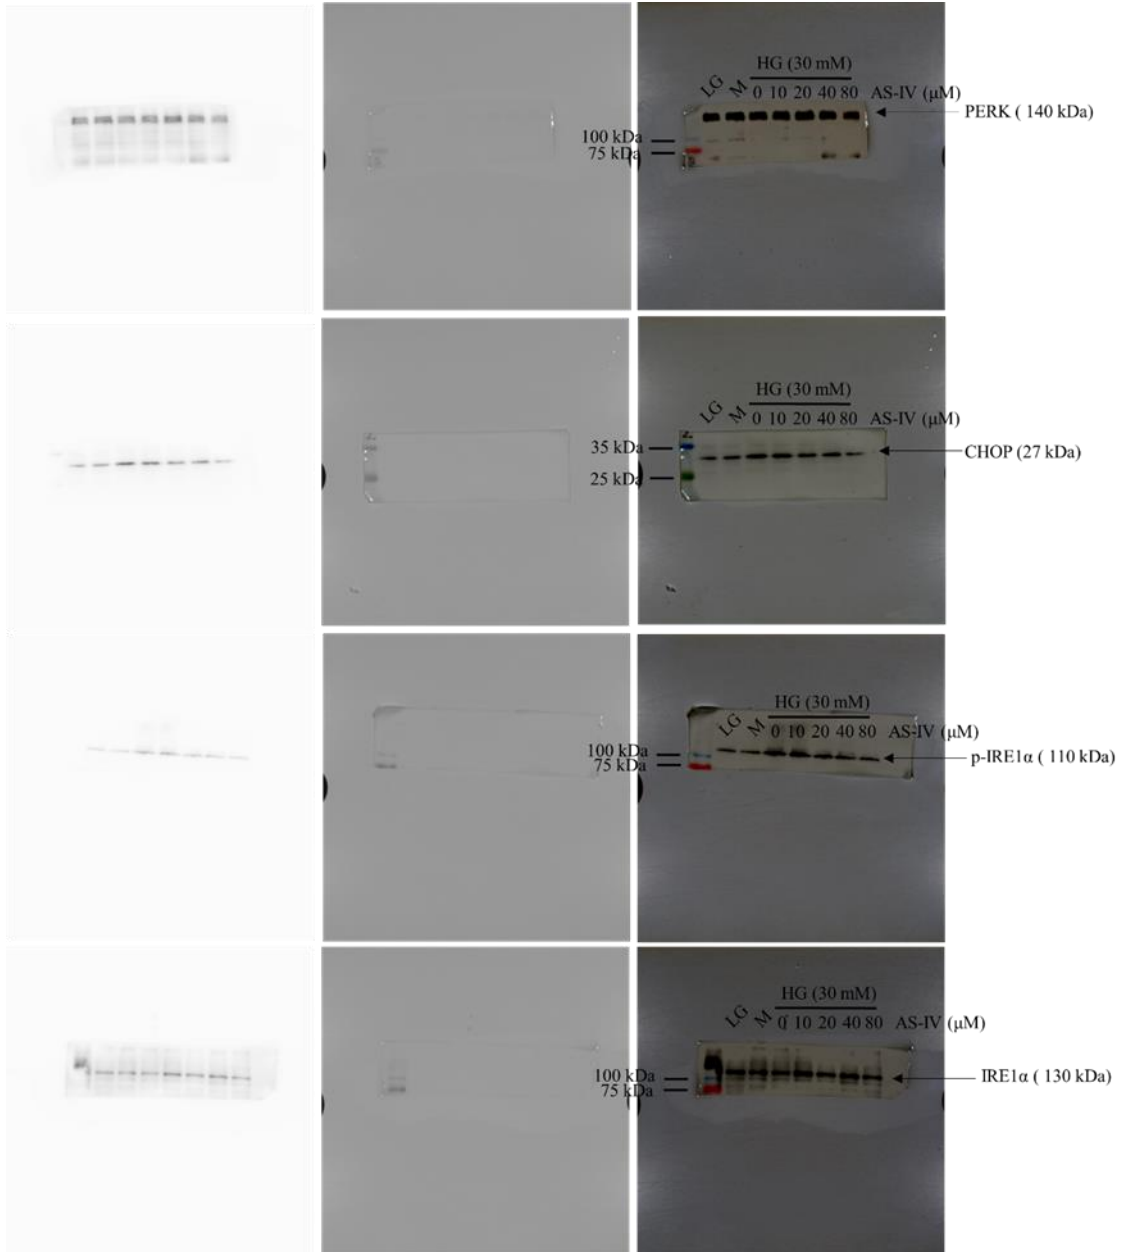

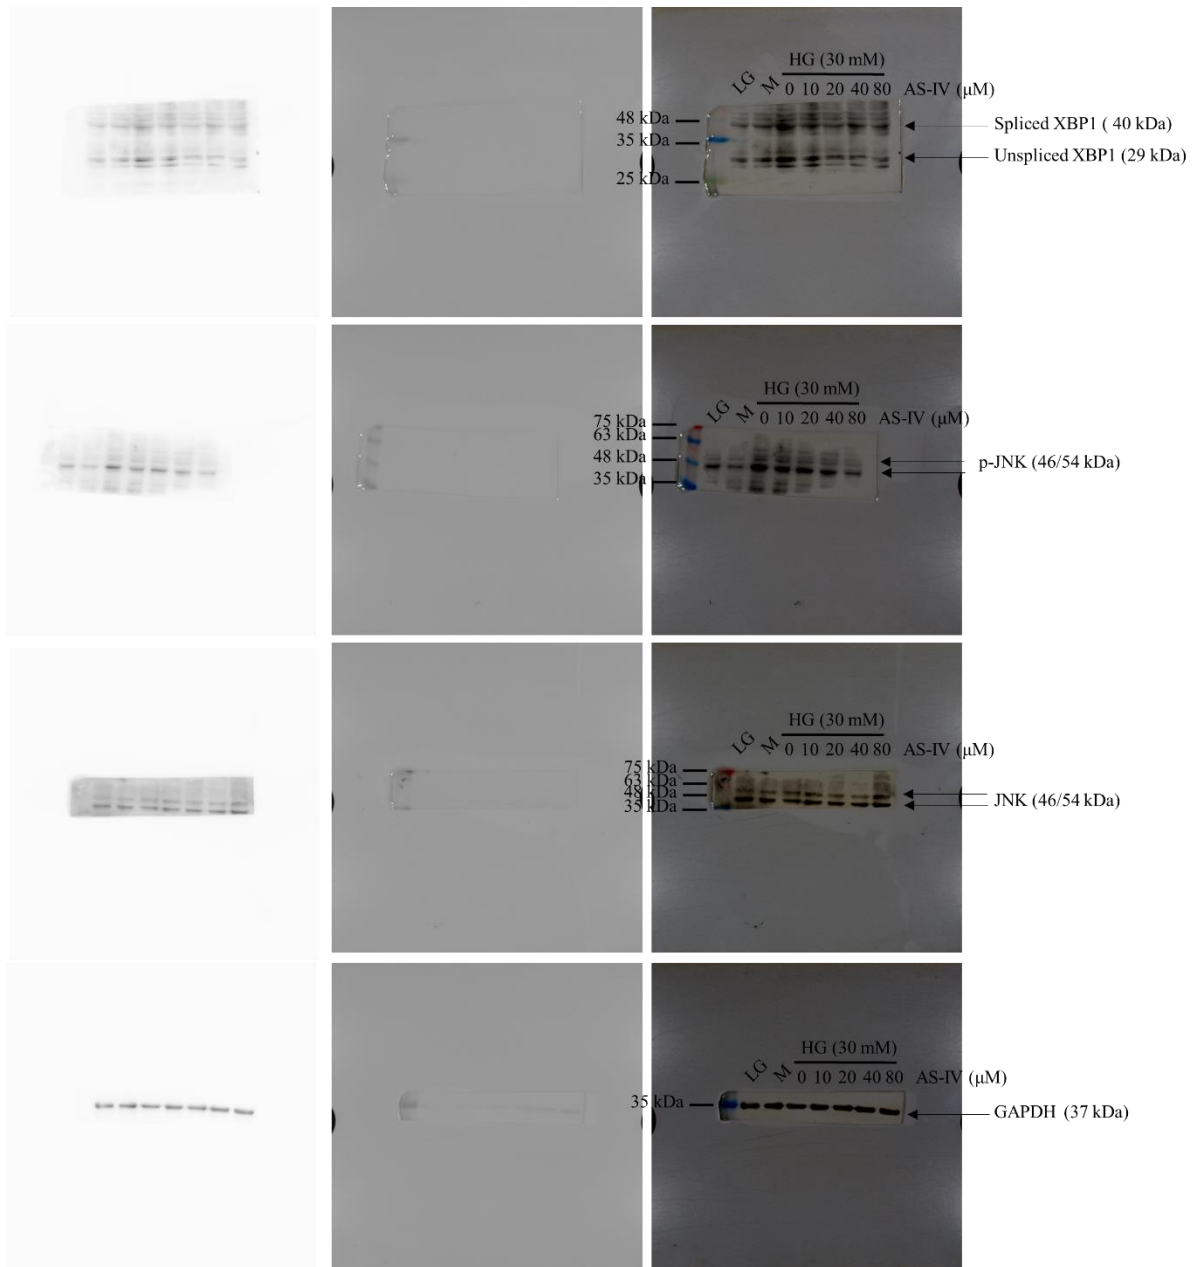

**D**

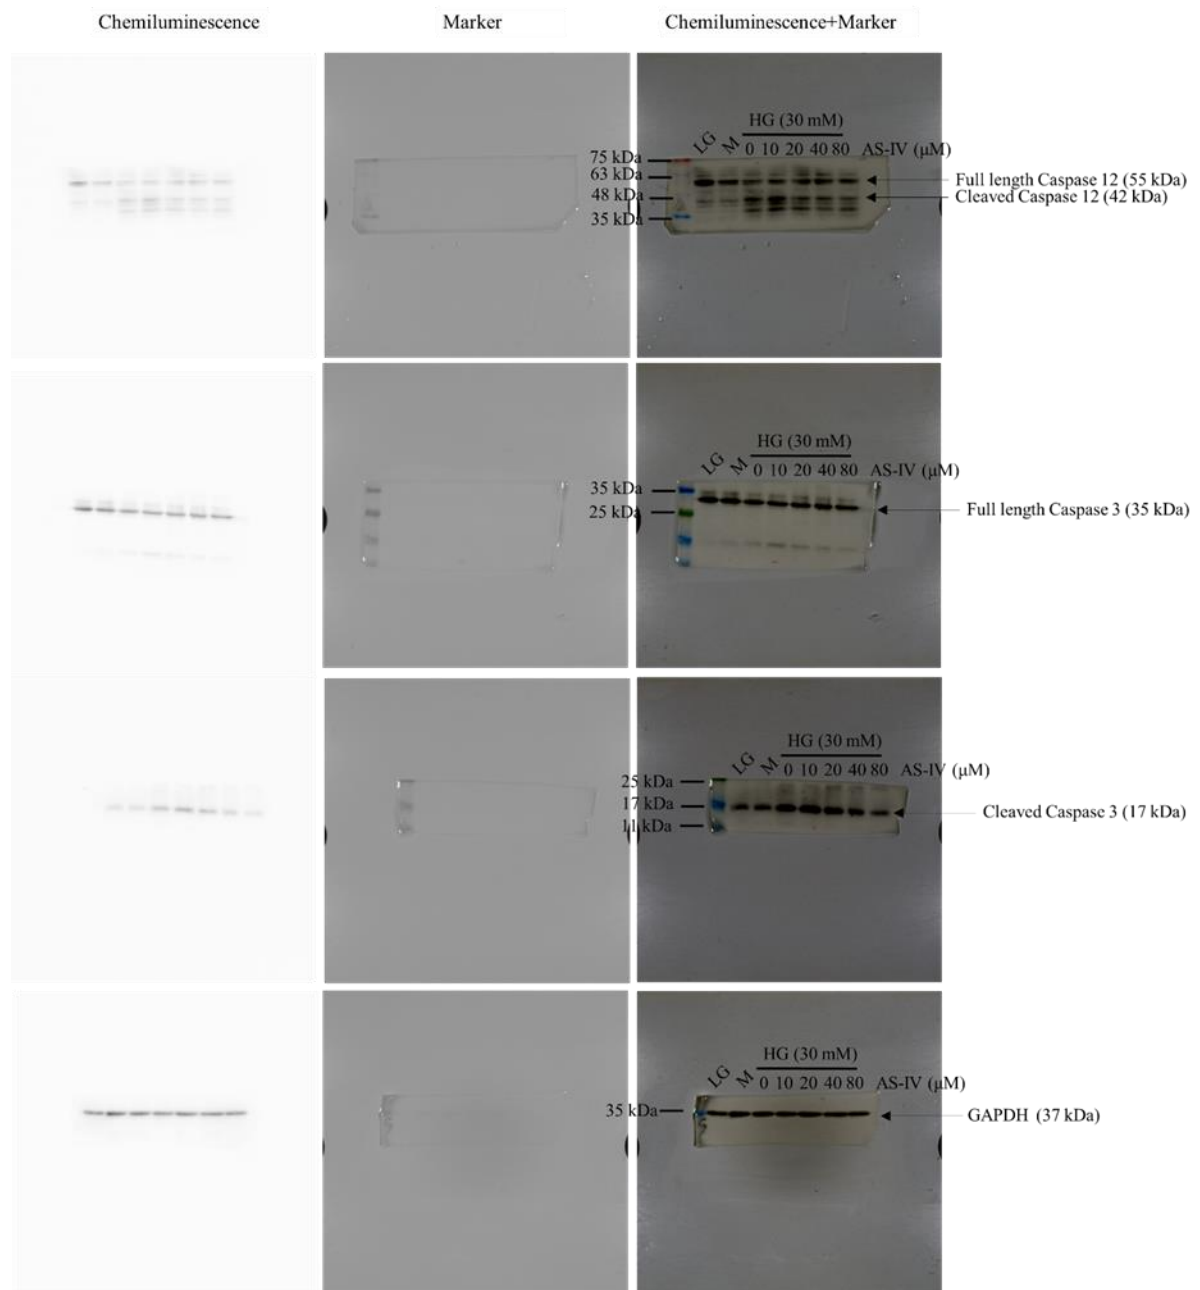

**Supplementary Figure S7. The original blots for cropped blots presented in Figure 6. (A)** Prestained dual color protein molecular weight marker. **(B)** The original blots for panel A presented in Figure 6 in the main text. **(C)** The original blots for panel C presented in Figure 6 in the main text. **(D)** The original blots for panel F presented in Figure 6 in the main text. LG, low glucose; M, mannitol; HG, high glucose.



**A**

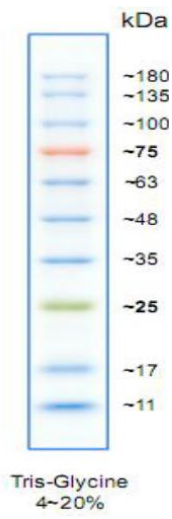

**B**

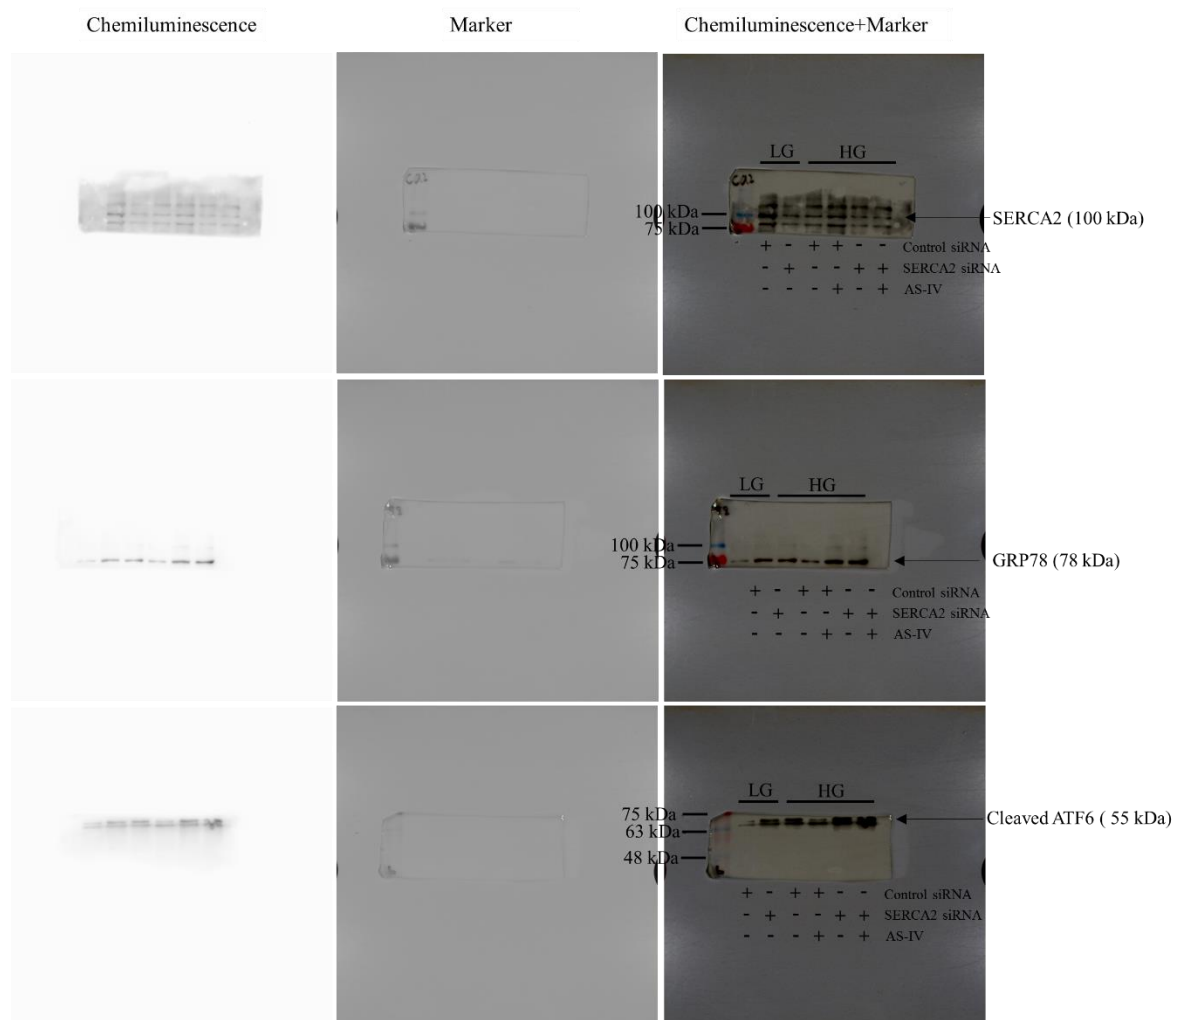

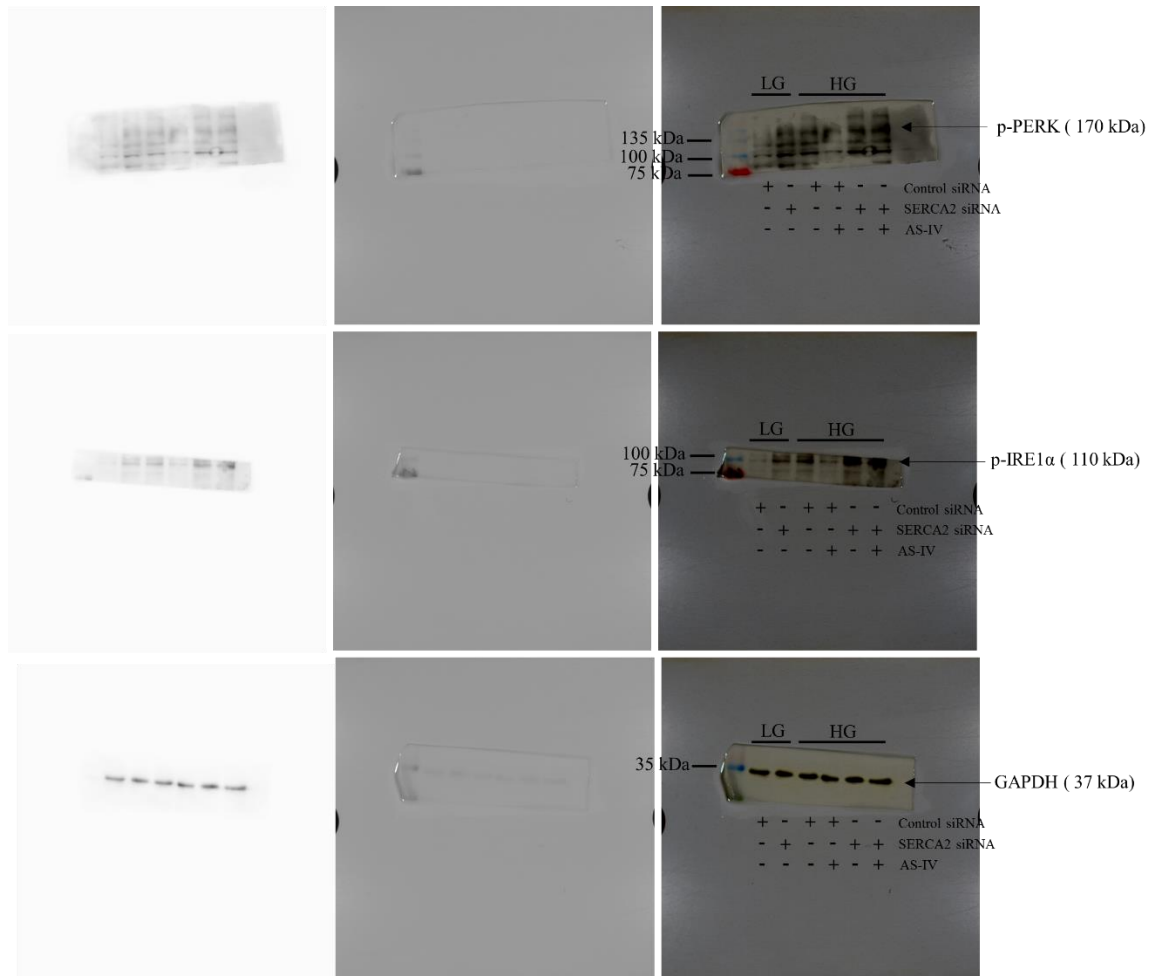

**Supplementary Figure S8. The original blots for cropped blots presented in Figure 7. (A) Prestained dual color protein molecular weight marker. (B) The original blots for panel A presented in Figure 7 in the main text. LG, low glucose; HG, high glucose;**

A



**B**

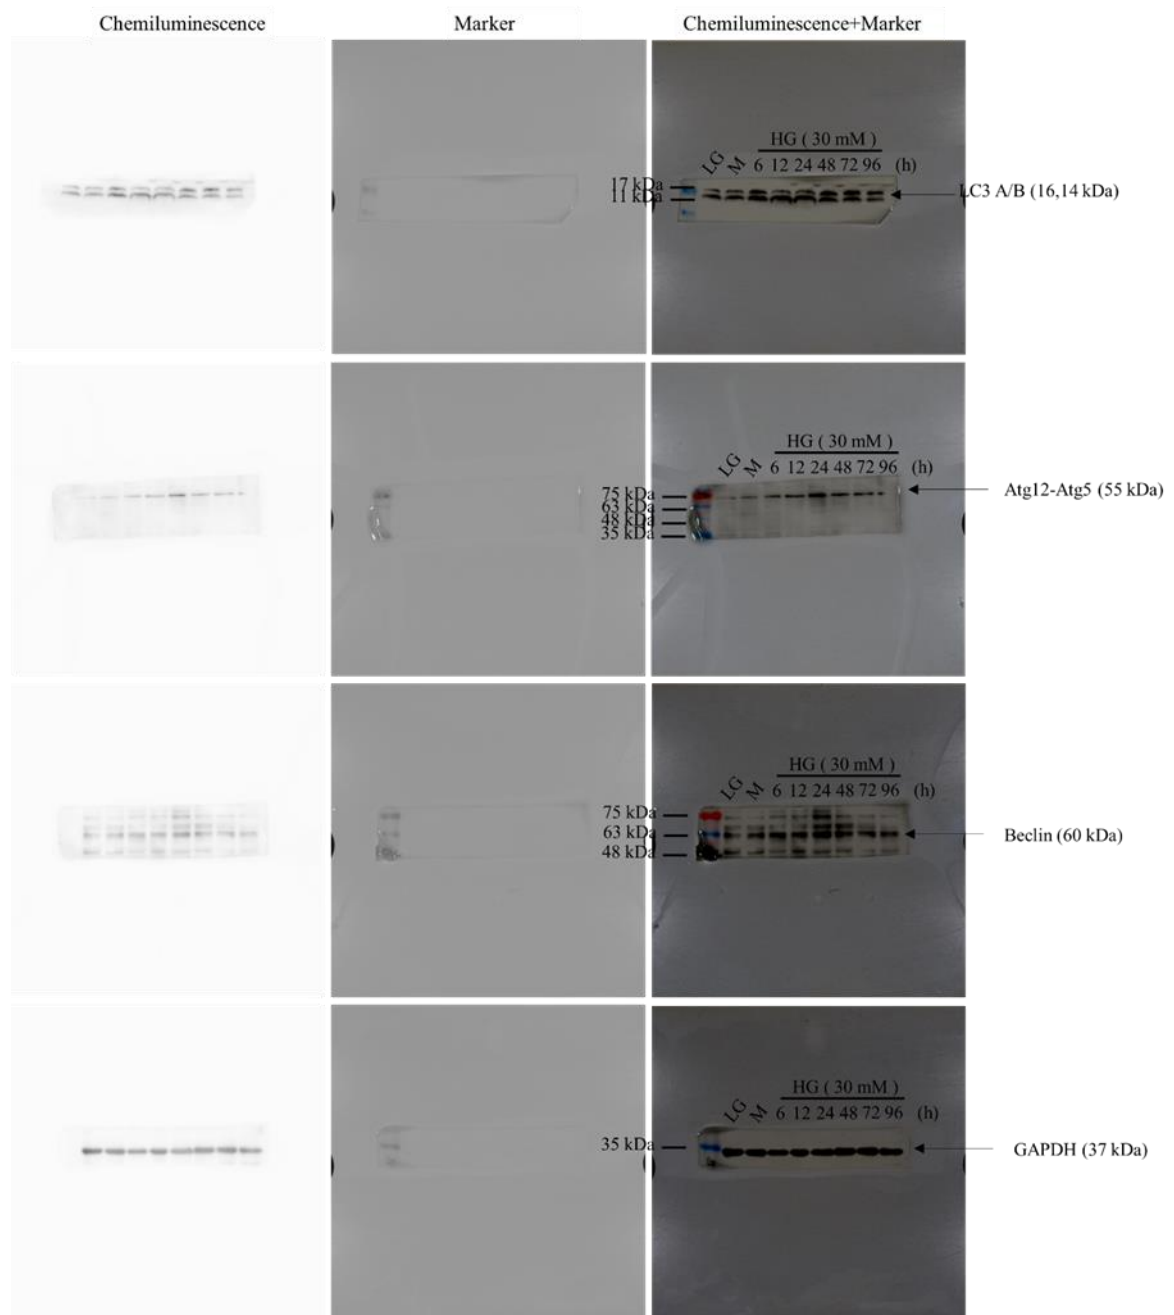

C

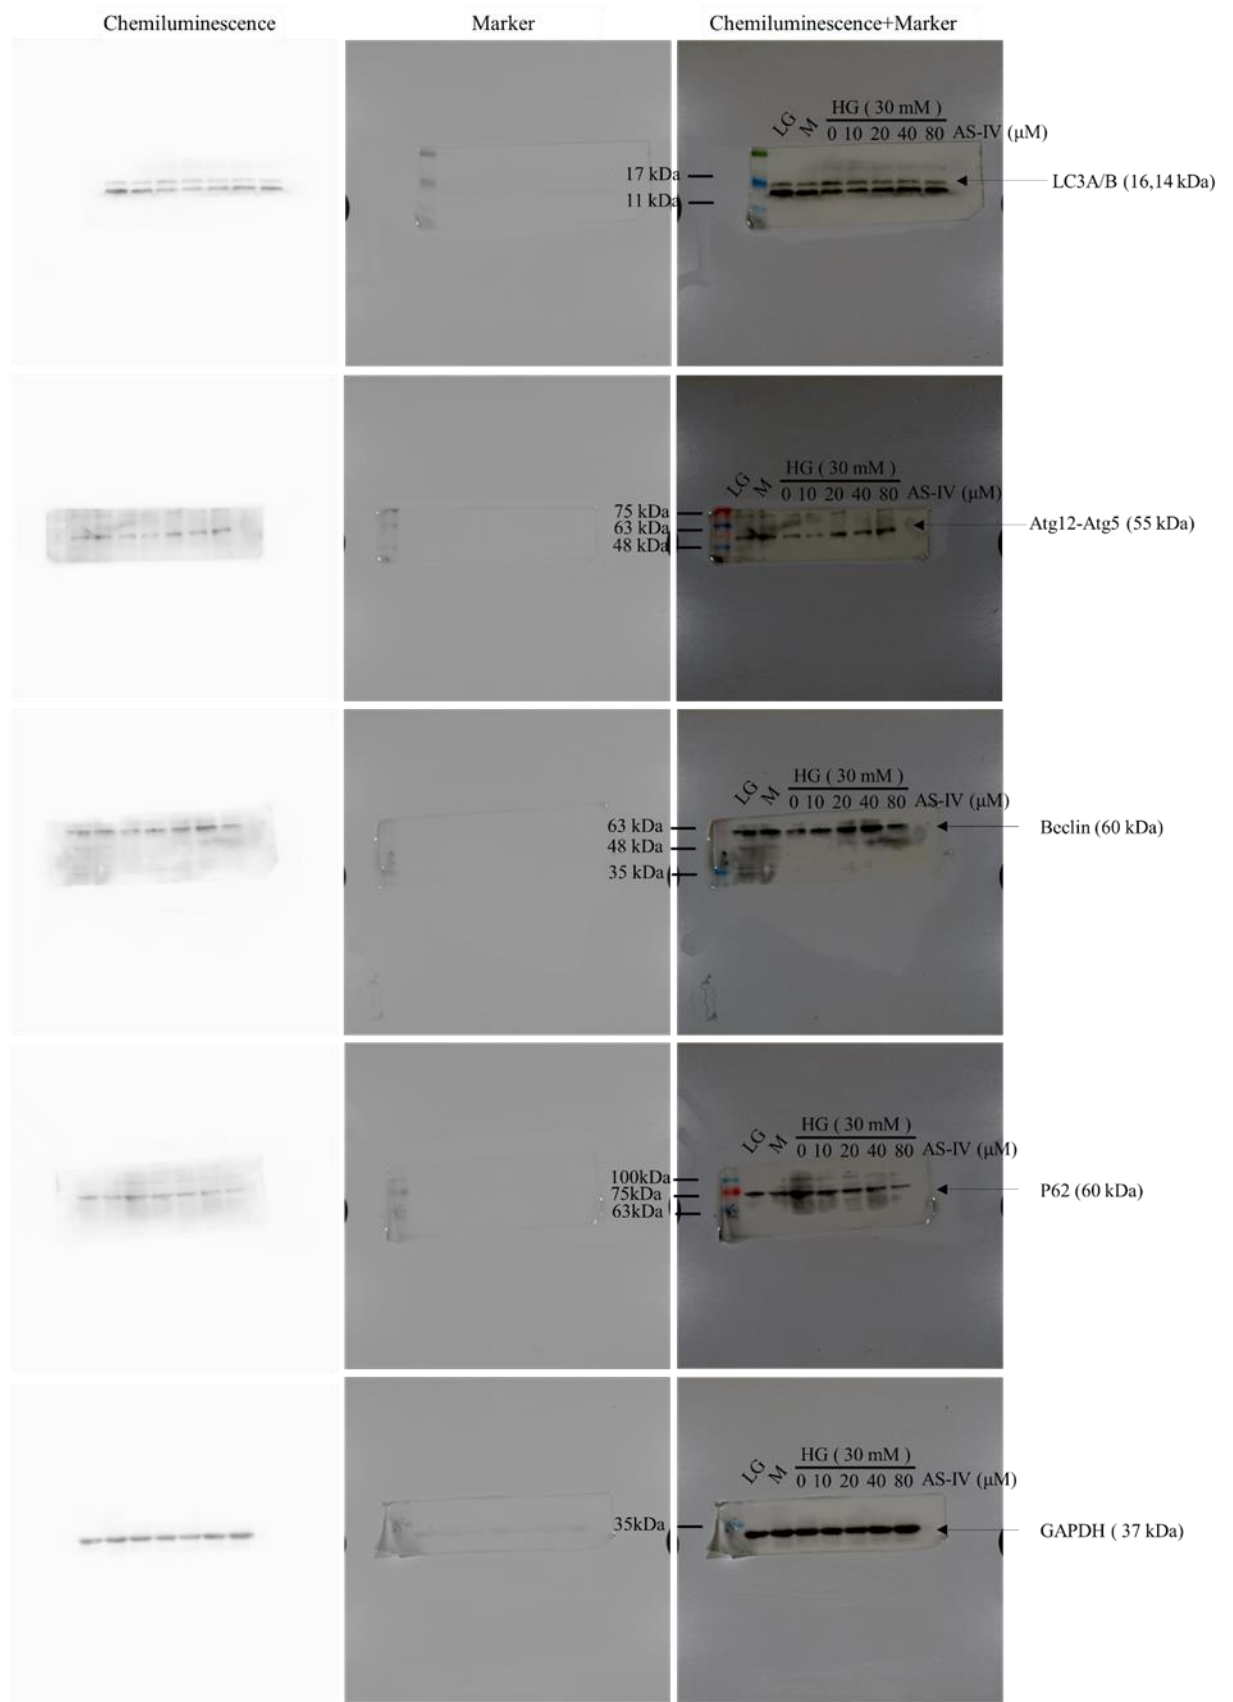

**D**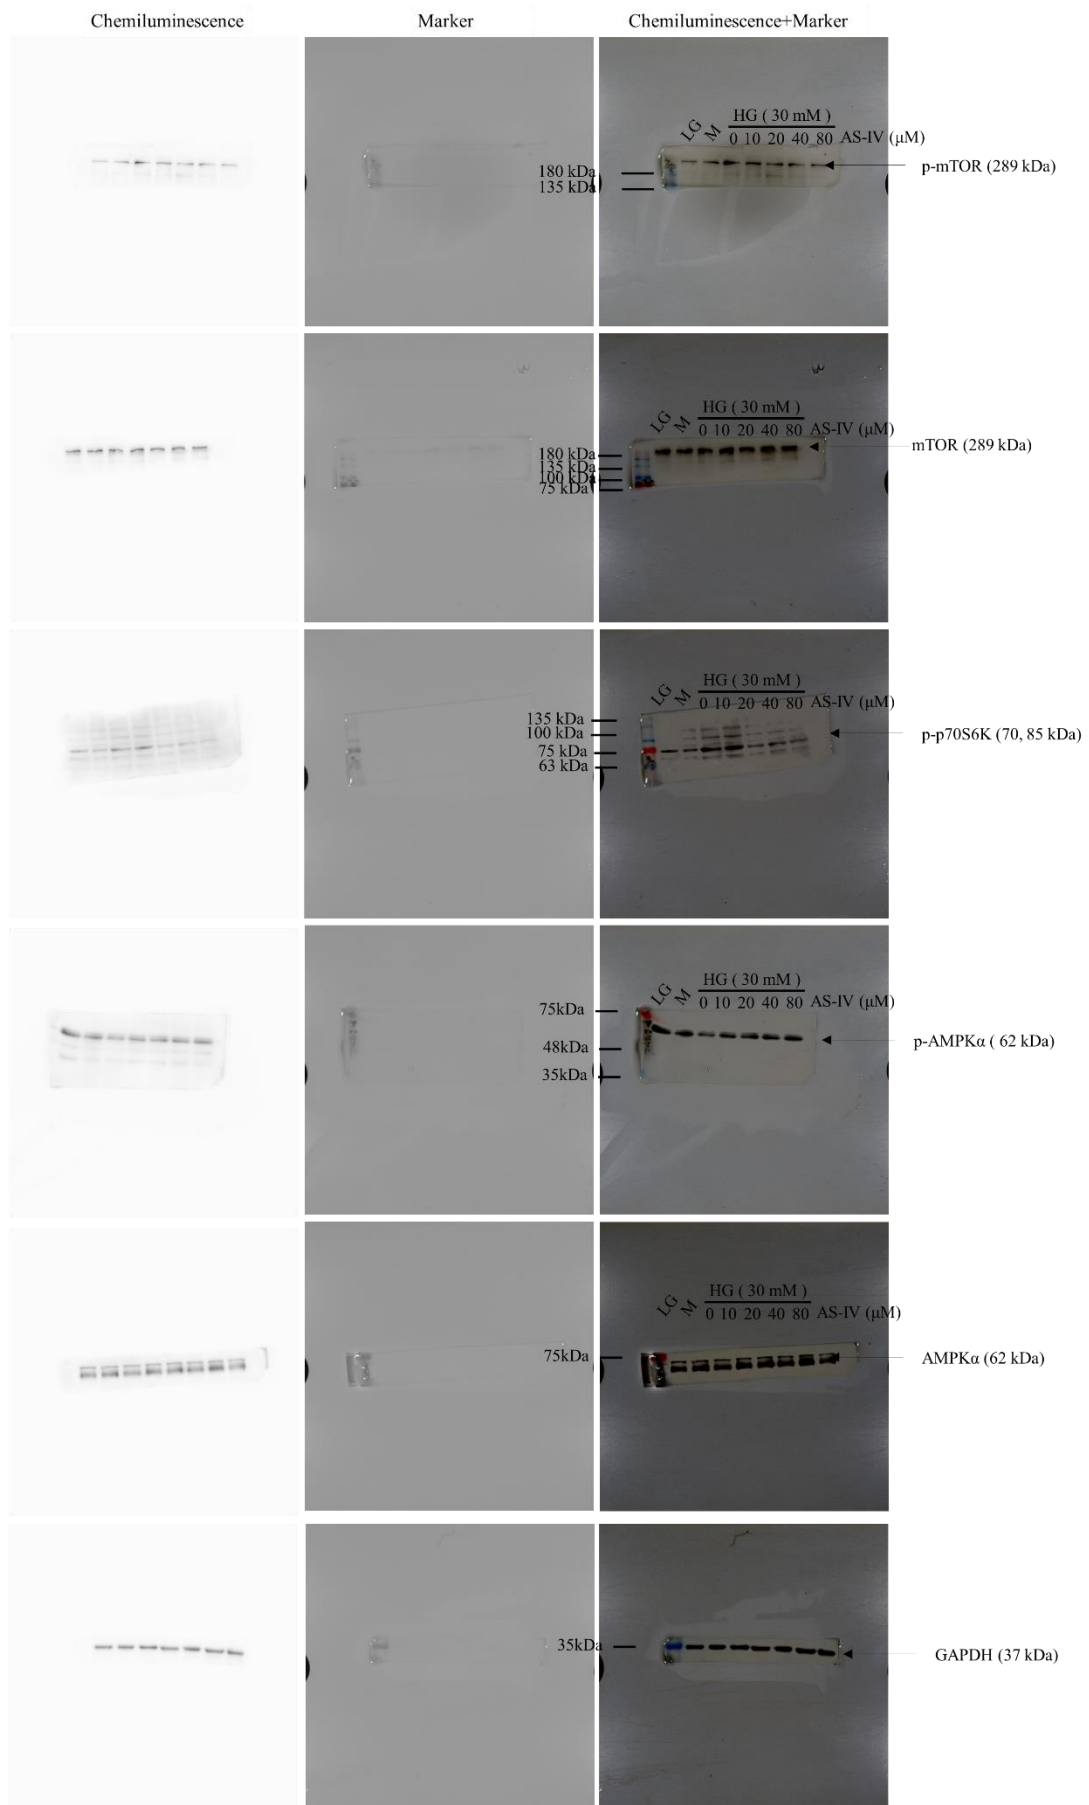

**Supplementary Figure S9. The original blots for cropped blots presented in Figure 8.** (A) Prestained dual color protein molecular weight marker. (B) The original blots for panel A presented in Figure 8 in the main text. (C) The original blots for panel D presented in Figure 8 in the main text. (D) The original blots for panel F presented in Figure 8 in the main text. LG, low glucose; M, mannitol; HG, high glucose.

**A**



**B**

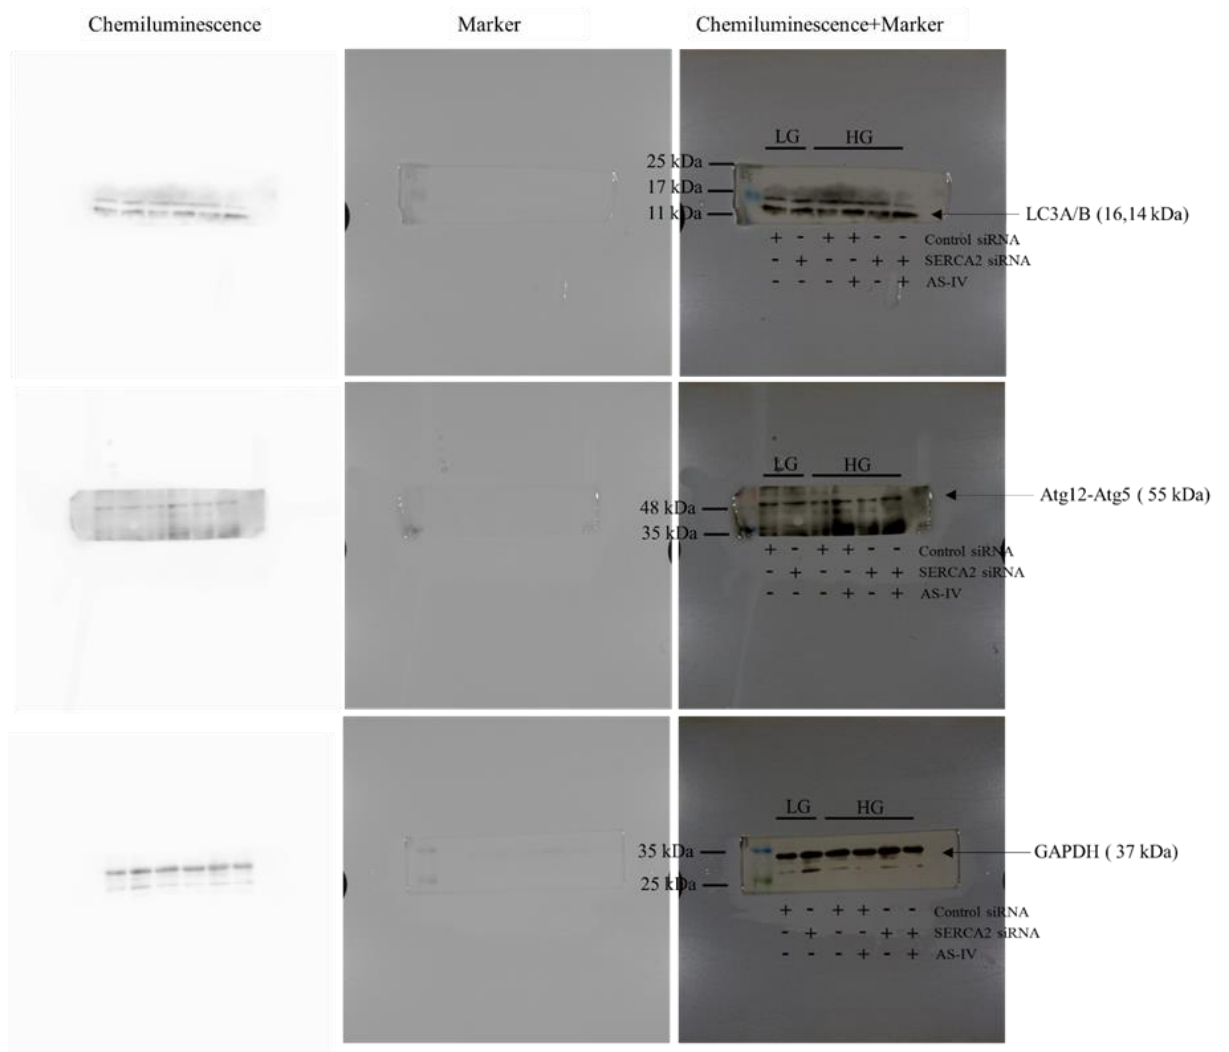



C

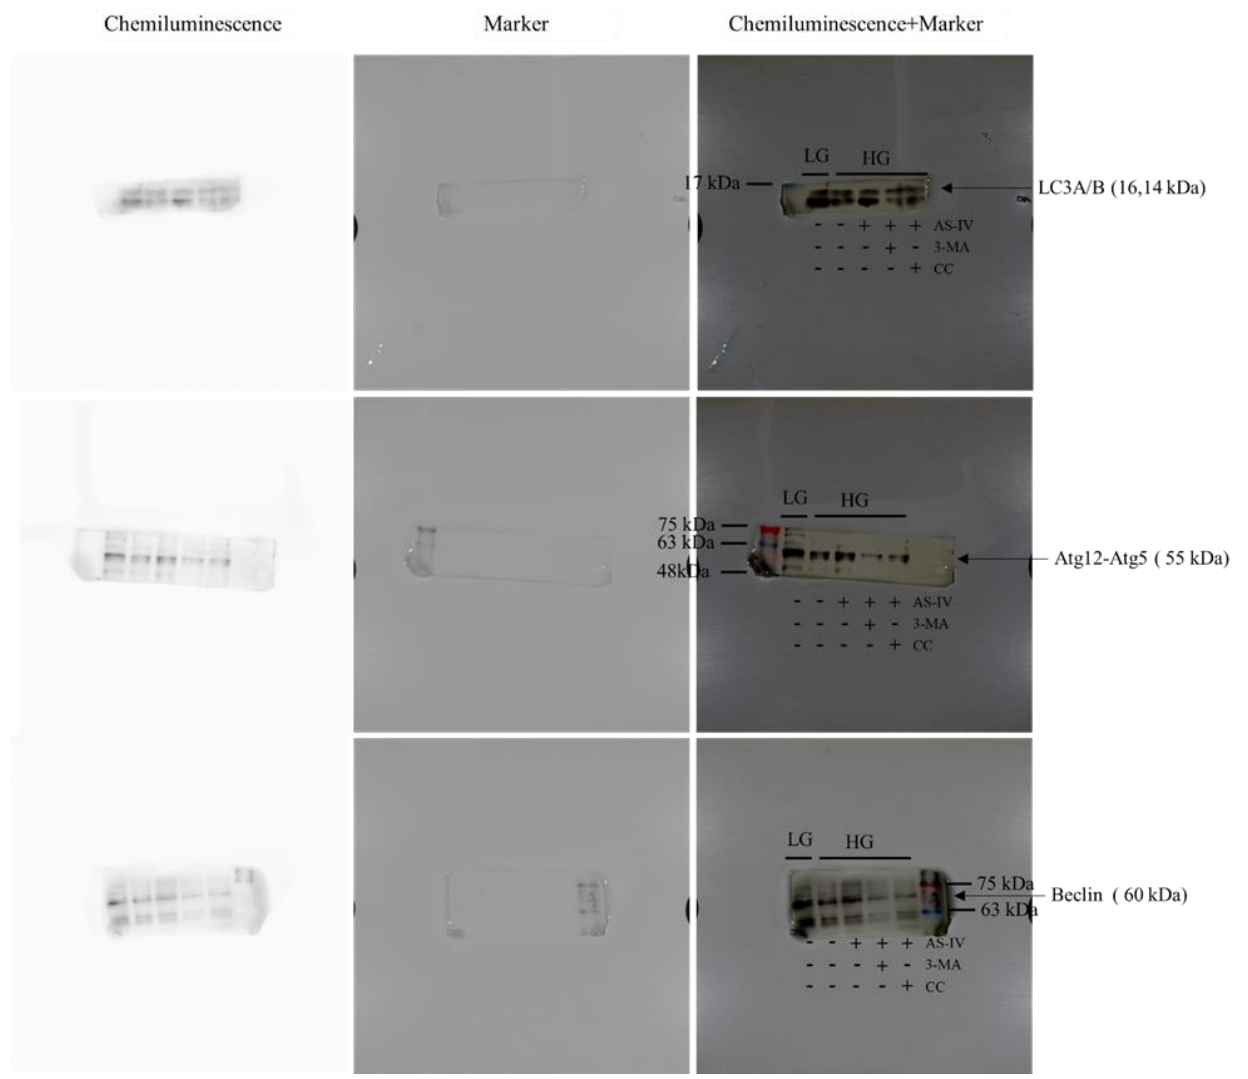

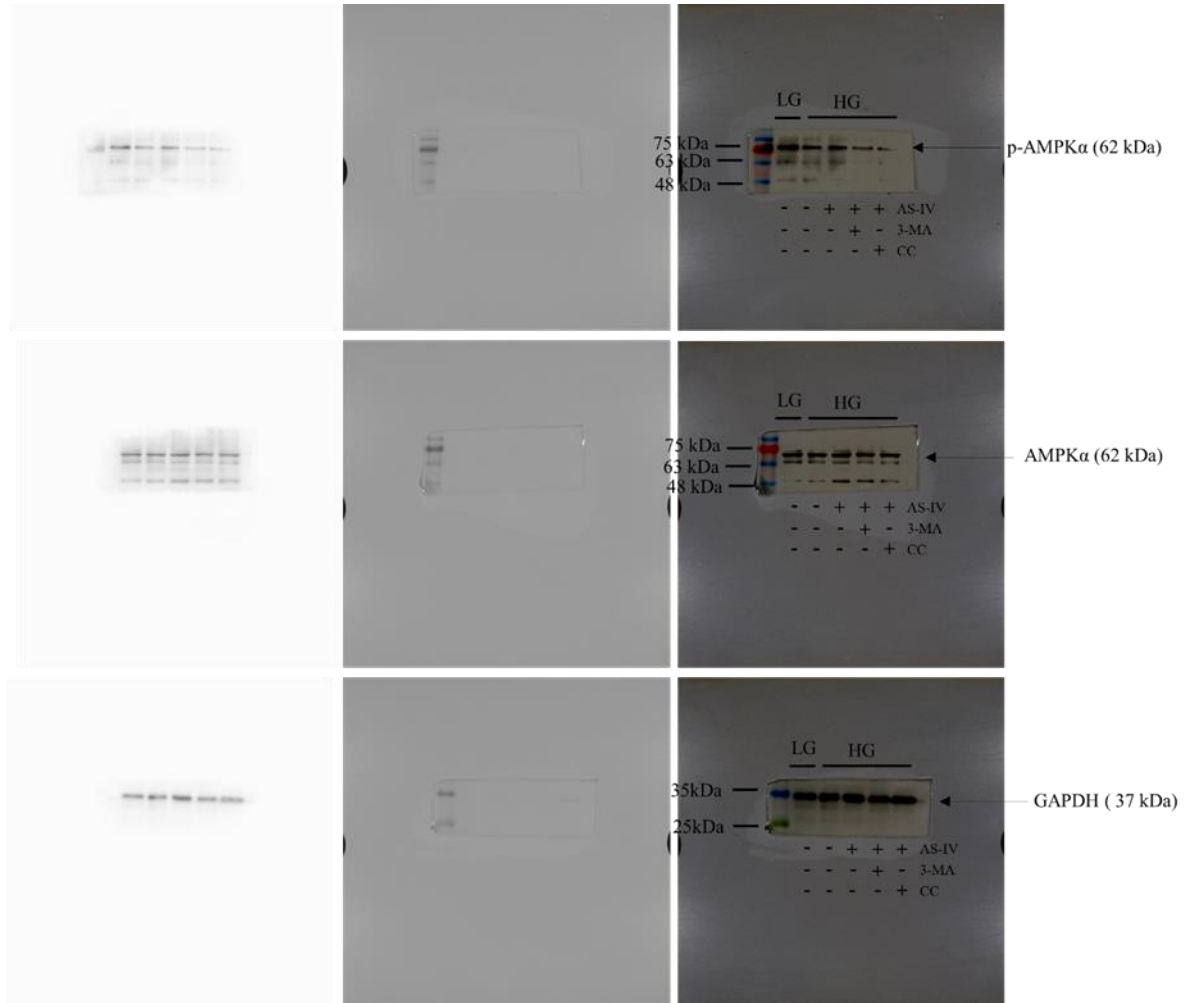

**Supplementary Figure S10. The original blots for cropped blots presented in Figure 9. (A) Prestained dual color protein molecular weight marker. (B) The original blots for panel A presented in Figure 9 in the main text. (C) The original blots for panel C presented in Figure 9 in the main text. LG, low glucose; HG, high glucose. 3-MA, 3-methyladenine; CC, compound C.**
